# Supplementary material for: Protocol of a multicentre, prospective cohort study that evaluates cost-effectiveness of two perioperative care strategies for potential obstructive sleep apnoea in morbidly obese patients undergoing bariatric surgery
Source: PubMed Central journal article supplement — BMJ Open. 2020 Oct 7;10(10):e038830. doi: 10.1136/bmjopen-2020-038830 (PMC7542938; doi:10.1136/bmjopen-2020-038830), 2020-10-07
Supplement: bmjopen-2020-038830.draft_revisions.pdf [file bmjopen-2020-038830.draft_revisions.pdf]

# BMJ Open

BMJ Open is committed to open peer review. As part of this commitment we make the peer review history of every article we publish publicly available.

When an article is published we post the peer reviewers' comments and the authors' responses online. We also post the versions of the paper that were used during peer review. These are the versions that the peer review comments apply to.

The versions of the paper that follow are the versions that were submitted during the peer review process. They are not the versions of record or the final published versions. They should not be cited or distributed as the published version of this manuscript.

BMJ Open is an open access journal and the full, final, typeset and author-corrected version of record of the manuscript is available on our site with no access controls, subscription charges or pay-per-view fees (<http://bmjopen.bmj.com>).

If you have any questions on BMJ Open's open peer review process please email [info.bmjopen@bmj.com](mailto:info.bmjopen@bmj.com)

# BMJ Open

**Protocol of a multicenter, prospective cohort study that evaluates cost-effectiveness of two perioperative care strategies for potential obstructive sleep apnea in morbidly obese patients undergoing bariatric surgery.**

|                               |                                                                                                                                                                                                                                                                                                                                                                                                                                                                                                                                                  |
|-------------------------------|--------------------------------------------------------------------------------------------------------------------------------------------------------------------------------------------------------------------------------------------------------------------------------------------------------------------------------------------------------------------------------------------------------------------------------------------------------------------------------------------------------------------------------------------------|
| Journal:                      | <i>BMJ Open</i>                                                                                                                                                                                                                                                                                                                                                                                                                                                                                                                                  |
| Manuscript ID                 | bmjopen-2020-038830                                                                                                                                                                                                                                                                                                                                                                                                                                                                                                                              |
| Article Type:                 | Protocol                                                                                                                                                                                                                                                                                                                                                                                                                                                                                                                                         |
| Date Submitted by the Author: | 25-Mar-2020                                                                                                                                                                                                                                                                                                                                                                                                                                                                                                                                      |
| Complete List of Authors:     | van Veldhuisen, Sophie; Rijnstate Hospital, Department of Surgery / Vitalys Clinic<br>Kuppens, Kim; St Antonius Hospital, Department of Pulmonary Medicine<br>de Raaff, Christel; Albert Schweitzer Hospital, Department of Surgery<br>Frederix, Geert; Universitair Medisch Centrum Utrecht, Department of Public Health, Julius Center Research Program Methodology<br>Hazebroek, Eric; Rijnstate Hospital, Vitalys Clinic, Department of Surgery / Vitalys Clinic; Wageningen University and Research, Division of Human Nutrition and Health |
| Keywords:                     | Sleep medicine < ANAESTHETICS, SLEEP MEDICINE, Adult surgery < SURGERY, RESPIRATORY MEDICINE (see Thoracic Medicine)                                                                                                                                                                                                                                                                                                                                                                                                                             |
|                               |                                                                                                                                                                                                                                                                                                                                                                                                                                                                                                                                                  |

SCHOLARONE™  
Manuscripts

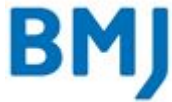

I, the Submitting Author has the right to grant and does grant on behalf of all authors of the Work (as defined in the below author licence), an exclusive licence and/or a non-exclusive licence for contributions from authors who are: i) UK Crown employees; ii) where BMJ has agreed a CC-BY licence shall apply, and/or iii) in accordance with the terms applicable for US Federal Government officers or employees acting as part of their official duties; on a worldwide, perpetual, irrevocable, royalty-free basis to BMJ Publishing Group Ltd ("BMJ") its licensees and where the relevant Journal is co-owned by BMJ to the co-owners of the Journal, to publish the Work in this journal and any other BMJ products and to exploit all rights, as set out in our [licence](#).

The Submitting Author accepts and understands that any supply made under these terms is made by BMJ to the Submitting Author unless you are acting as an employee on behalf of your employer or a postgraduate student of an affiliated institution which is paying any applicable article publishing charge ("APC") for Open Access articles. Where the Submitting Author wishes to make the Work available on an Open Access basis (and intends to pay the relevant APC), the terms of reuse of such Open Access shall be governed by a Creative Commons licence – details of these licences and which [Creative Commons](#) licence will apply to this Work are set out in our licence referred to above.

Other than as permitted in any relevant BMJ Author's Self Archiving Policies, I confirm this Work has not been accepted for publication elsewhere, is not being considered for publication elsewhere and does not duplicate material already published. I confirm all authors consent to publication of this Work and authorise the granting of this licence.

- 1
- 2
- 3 1 **PROTOCOL OF A MULTICENTER, PROSPECTIVE COHORT STUDY THAT EVALUATES COST-**
- 4
- 5 2 **EFFECTIVENESS OF TWO PERIOPERATIVE CARE STRATEGIES FOR POTENTIAL OBSTRUCTIVE**
- 6
- 7
- 8 3 **SLEEP APNEA IN MORBIDLY OBESE PATIENTS UNDERGOING BARIATRIC SURGERY.**
- 9
- 10
- 11
- 12
- 13
- 14
- 15
- 16
- 17
- 18
- 19
- 20
- 21
- 22
- 23
- 24
- 25
- 26
- 27
- 28
- 29
- 30
- 31
- 32
- 33
- 34
- 35
- 36
- 37
- 38
- 39
- 40
- 41
- 42
- 43
- 44
- 45
- 46
- 47
- 48
- 49
- 50
- 51
- 52
- 53
- 54
- 55
- 56
- 57
- 58
- 59
- 60

For peer review only

## 4 **ABSTRACT**

### 5 **Introduction**

6 Despite the high prevalence of obstructive sleep apnea (OSA) in obese patients undergoing  
7 bariatric surgery, OSA is undiagnosed in the majority of patients and thus untreated. While  
8 untreated OSA is associated with an increased risk of per- and postoperative complications,  
9 no evidence-based guidelines on perioperative care for these patients are available. The aim  
10 of the POPCORN study (*Post-Operative Pulse oximetry without OSA sCreening vs.*  
11 *perioperative continuous positive airway pressure (CPAP) treatment following OSA*  
12 *scReeNing by polygraphy (PG)*) is to evaluate which perioperative strategy is most cost-  
13 effective for obese patients undergoing bariatric surgery without a history of OSA.

### 14 **Methods and analysis**

15 In this multicenter observational cohort study, data from 1380 patients who will undergo  
16 bariatric surgery will be collected. Patients will either receive postoperative care with pulse  
17 oximetry monitoring and supplemental oxygen during the first postoperative night, or they  
18 receive care that includes preoperative PG and CPAP treatment in case of moderate or  
19 severe OSA. Local protocols for perioperative care in each participating hospital will  
20 determine into which cohort a patient is placed. The primary outcome is cost-effectiveness,  
21 which will be calculated by comparing all health care costs to the quality-adjusted-life-years  
22 (QALYs, calculated using EQ-5D questionnaires). Secondary outcomes are mortality,  
23 complications within 30 days after surgery, readmissions, reoperations, length of stay,  
24 weight loss, generic quality of life (QOL), OSA-specific QOL, OSA symptoms and CPAP  
25 adherence. Patients will receive questionnaires before surgery and 1, 3, 6, and 12 months  
26 after surgery to report QALYs and other patient reported outcomes.

### 27 **Ethics and dissemination**

1  
2  
3 28 Approval from the Medical research Ethics Committees United was granted in accordance  
4  
5  
6 29 with the Dutch law for Medical Research Involving Human Subjects Act (WMO) (reference  
7  
8 30 number W17.050). Results will be submitted for publication in peer-reviewed journals and  
9  
10 31 presented at (inter)national conferences.

### 32 **Trial registration number**

33 NTR6991  
34  
35

### 36 **Article summary**

#### 37 Strengths and limitations of this study

- 38 • This study is the first prospective study to compare and analyze cost-effective  
39 methods for perioperative care of obese patients with no known OSA history. Giving  
40 the growing worldwide epidemic of obesity, all aspects of bariatric surgery need to  
41 be assessed for costs and efficacy in order to achieve affordable and high-quality  
42 health care for patients with morbid obesity.
- 43 • Results of this study will provide insight in many aspects of pre- and perioperative  
44 interventions that is currently lacking, such as the impact on postoperative  
45 complications, influence on QOL, change of sleepiness symptoms, and adherence  
46 rates to CPAP in patients who were asymptomatic or did not experience recognized  
47 symptoms.
- 48 • This study includes a large population that will be monitored to evaluate OSA care in  
49 bariatric patients. For a study that evaluates a perioperative intervention, the  
50 duration of follow-up of one year is relatively long.

- 1  
2  
3 51 • Despite the non-randomized design, we hypothesize that both cohorts will embody  
4  
5 52 the average patient that is scheduled for a primary bariatric procedure due to the  
6  
7  
8 53 ample size and few exclusion criteria for study participants. Therefore, data gathered  
9  
10 54 in these cohorts will probably be applicable to the general bariatric population.  
11  
12  
13 55

## 15 56 INTRODUCTION

17  
18 57 Obesity is a health care issue of epidemic proportions that is rapidly increasing. Worldwide,  
19  
20 58 more than 650 million people are affected by obesity, defined as body mass index (BMI)  $\geq 30$   
21  
22 59 kg/m<sup>2</sup>, with subsequent morbidity and mortality(1). Many conservative and life-style  
23  
24  
25 60 interventions that are aimed at reducing weight are available but most lack effectiveness  
26  
27  
28 61 and durable results. To date, bariatric surgery is the only effective treatment for obesity that  
29  
30 62 achieves sustainable, long-term weight loss(2, 3).

31  
32 63 Obesity is the main risk factor for obstructive sleep apnea (OSA), a sleep-breathing  
33  
34  
35 64 disorder with recurrent breathing cessations that occur when the pharyngeal airway  
36  
37  
38 65 collapses completely or partially. These collapses are respectively called apneas and  
39  
40 66 hypopneas. The number of breathing cessations per hour of sleep, the apnea hypopnea  
41  
42 67 index (AHI), indicates the severity of OSA (4, 5). Intermittent hypoxemia, hypercapnia and  
43  
44  
45 68 arousals from sleep are a result of breathing cessations, which lead to excessive daytime  
46  
47  
48 69 sleepiness, cognitive impairment and increased risk of cardiovascular disease. The golden  
49  
50 70 standard for OSA diagnosis is an in-laboratory polysomnography (PSG), but in recent years  
51  
52 71 home-based polygraphy (PG) has also been validated as a diagnostic tool(6). Currently, the  
53  
54  
55 72 best treatment for OSA is positive airway pressure (PAP), most commonly provided as  
56  
57  
58 73 continuous PAP (CPAP), and aims to maintain an open airway during sleep. Hereby, arousals  
59  
60

1  
2  
3 74 from sleep will be reduced, which improves daytime functioning with less excessive  
4  
5 75 sleepiness, as well as quality of life and cognitive functioning(7).  
6  
7

8 76 OSA is highly prevalent in patients who are eligible for bariatric surgery, affecting  
9  
10 77 approximately 60-70%, compared to OSA prevalence of 3-17% in the general adult  
11  
12 78 population(8-10). Due to the strong correlation of OSA and obesity, weight loss should be  
13  
14 79 recommended to all obese patients with moderate or severe OSA(11, 12). Bariatric surgery is  
15  
16 80 highly effective for this disease, as 60-85% patients achieve complete remission of OSA or  
17  
18 81 significant reduction of their disease severity(2, 13-16).  
19  
20  
21

22 82 Perioperative care for bariatric patients with OSA pose a clinical challenge, given that  
23  
24 83 the majority is asymptomatic or experiences unrecognized symptoms, and is consequently  
25  
26 84 untreated(17). Opioids administered during general anesthesia can induce long-lasting  
27  
28 85 apneas in patients with untreated OSA. As a result, (untreated) OSA is associated with a  
29  
30 86 higher risk of cardiopulmonary and neurovascular complications, as well as higher overall  
31  
32 87 mortality and morbidity in general surgery populations(18, 19). Evidence that this  
33  
34 88 phenomenon of increased perioperative risk also exists in bariatric patients is thin, and most  
35  
36 89 studies do not mention whether precautions were taken to prevent OSA-related adverse  
37  
38 90 events(20). More recent prospective studies and reviews demonstrate a consistently low  
39  
40 91 incidence of cardiopulmonary and neurovascular complications following bariatric surgery,  
41  
42 92 and statistical analyses fail to indicate a direct causative link to OSA(21-23).  
43  
44  
45  
46  
47  
48

49 93 Evidence-based guidelines for perioperative care of potential OSA in bariatric  
50  
51 94 patients are lacking(24). Therefore, a wide variety of perioperative modalities has emerged,  
52  
53 95 that all aim to minimize the risk of serious adverse events related to untreated OSA. One of  
54  
55 96 the options is routine preoperative assessment of OSA in every bariatric patient by  
56  
57 97 performing PSG or PG. Newly diagnosed moderate or severe OSA patients will consequently  
58  
59  
60



1  
2  
3 98 be treated with CPAP. Another option relies on questionnaires to identify patients at high  
4  
5 99 risk of OSA who subsequently undergo PG. These questionnaires, such as the STOP-BANG or  
6  
7  
8 100 Berlin questionnaire, are frequently used, but none of these screening tools has been able to  
9  
10 101 render both high sensitivity and specificity. Therefore, its applicability remains  
11  
12  
13 102 controversial(25-27). Another alternative is routine, postoperative continuous monitoring  
14  
15 103 with pulse oximetry with supplemental non-invasive oxygen administration but without  
16  
17  
18 104 preoperative OSA assessment. In this approach, all patients receive the same intervention to  
19  
20 105 achieve adequate saturation levels in the early post-operative phase(21).

21  
22  
23 106 Obesity and obesity-related disorders increasingly demand utilization of available  
24  
25 107 health care resources. Justification of high screening expenses for OSA is debatable given the  
26  
27  
28 108 low incidence of OSA-related complications, despite the high prevalence of OSA. In addition,  
29  
30 109 CPAP adherence rates are poor even in patients with symptomatic OSA, ranging between 29-  
31  
32 110 83%(28). While specific data are lacking, adherence rates are putatively even lower in  
33  
34  
35 111 asymptomatic bariatric patients, which questions the actual protective effect that is added  
36  
37 112 by preoperative initiation of CPAP. In contrast, adequate treatment with CPAP in  
38  
39  
40 113 symptomatic OSA patients positively influences societal costs, as symptomatic patients  
41  
42 114 without treatment use more health care resources, suffer more unemployment and are  
43  
44  
45 115 more prone to work-related or traffic accidents(29-31). However, routine screening and  
46  
47 116 treatment of asymptomatic patients is not likewise supported by conclusive evidence(27,  
48  
49  
50 117 32). Deliberate consideration is needed when comparing outcomes such as safety, costs and  
51  
52 118 patients' satisfaction between different perioperative strategies for OSA care in bariatric  
53  
54 119 patients.

55  
56  
57 120

58  
59 121 **RATIONALE**  
60

1  
2  
3 122 The primary aim of the POPCORN study (*Post-Operative Pulse oximetry without OSA*  
4  
5 123 *s*creening vs. *OSA sc*reeNing) is to evaluate the most cost-effective perioperative strategy  
6  
7 124 for bariatric patients who have no history of OSA. We will compare postoperative  
8  
9 125 continuous pulse oximetry without OSA screening with routine OSA screening by PG and  
10  
11 126 subsequent application of CPAP. This study will provide evidence that will enable clinicians  
12  
13 127 to make an evidence-based decision on perioperative care of patients with no known OSA  
14  
15 128 undergoing bariatric surgery. This paper describes the design and protocol of the POPCORN  
16  
17 129 study.  
18  
19  
20  
21  
22  
23  
24

130

## 131 **METHODS AND ANALYSIS**

### 132 **Study design**

133 The POPCORN study is a prospective, multicenter, observational cohort study that evaluates  
134 two cohorts of bariatric patients who have no history of OSA. The first cohort consists of  
135 patients who are postoperatively monitored with continuous pulse oximetry (CPOX cohort)  
136 who do not undergo a PG or PSG. In the second cohort, all bariatric patients undergo a  
137 preoperative PG and in case of moderate or severe OSA receive consequent treatment with  
138 CPAP before and after surgery (PPG cohort) (Figure 1).  
139

140

### 140 **Recruitment procedures and consent**

141 In total, 1380 obese patients scheduled to undergo bariatric surgery will be included for  
142 participation in the POPCORN study. For study participation, a subject must meet the  
143 following inclusion criteria: (A) preoperative BMI  $\geq 35$  kg/m<sup>2</sup> combined with an obesity-  
144 related comorbidity or preoperative BMI  $\geq 40$  kg/m<sup>2</sup>(33), (B) Age  $\geq 18$  years, (C) undergo a  
145 primary bariatric procedure. Potential subjects will be excluded from participating in the  
146

1  
2  
3 146 following situations: (A) previous bariatric surgery, such as laparoscopic adjustable gastric  
4  
5 147 banding; (B) inability to speak or read the Dutch language; (C) concomitantly performed  
6  
7  
8 148 procedures during bariatric surgery that increase the risk of postoperative complications and  
9  
10 149 costs, such as cholecystectomy or paraoesophageal hernia repair; (D) Use of treatment  
11  
12  
13 150 options for OSA other than PAP modalities, such as a mandibular advancement device or  
14  
15 151 positional therapy.

16  
17  
18 152 In both cohorts, 690 patients will be included. Local protocols of participating  
19  
20 153 hospitals will determine which strategy of perioperative care is used and this will  
21  
22  
23 154 consequently determine the allocation of patients into one of the two cohorts. Seven  
24  
25 155 hospitals in the Netherlands will collaborate to recruit all study-patients. Of the participating  
26  
27  
28 156 hospitals, the only hospital that applies CPOX without preoperative OSA screening is  
29  
30 157 Rijnstate Hospital, Arnhem, who will recruit patients for the CPOX arm. For the PG cohort,  
31  
32  
33 158 patients are recruited from the other participating hospitals (St. Antonius Hospital,  
34  
35 159 Nieuwegein; Onze Lieve Vrouwe Hospital, Amsterdam; Dutch Obesity Clinic, the Hague;  
36  
37 160 Zuyderland Hospital, Heerlen; Rode Kruis Hospital, Beverwijk and Máxima Medical Center,  
38  
39  
40 161 Veldhoven). Written or digitally signed informed consent will be obtained from all  
41  
42  
43 162 participants enrolled in this study. Recruitment has started in April 2018 and is expected to  
44  
45 163 be completed in March 2020.

46  
47 164

#### 48 49 165 **Continuous pulse oximetry (CPOX) - cohort**

50  
51  
52 166 Bariatric patients in the CPOX cohort receive no preoperative screening for OSA: no PG,  
53  
54 167 polysomnography or questionnaires for risk stratification are conducted. Postoperatively,  
55  
56  
57 168 bariatric patients return to the surgical ward where continuous surveillance with pulse  
58  
59 169 oximetry is immediately started, with supplemental oxygen provided via a nasal cannula (2  
60

1  
2  
3 170 L/min SpO<sub>2</sub>). Pulse oximetry is performed using a Draeger Infinity Delta monitor (Draeger  
4  
5  
6 171 Medical Systems Incorporated, USA). Clinical desaturations are defined as <92% SpO<sub>2</sub>, lasting  
7  
8 172 at least 10 seconds. A desaturation sets off an alarm that alerts the attending nurse who will  
9  
10 173 perform a clinical evaluation.

11  
12  
13 174

### 15 175 **Preoperative polygraphy (PPG) - cohort**

16  
17  
18 176 The PPG cohort will consist of bariatric patients that are preoperatively screened for OSA  
19  
20 177 with a polygraphy or polysomnography. Patients with moderate or severe disease, defined  
21  
22 178 as AHI $\geq$ 15 and AHI  $\geq$ 30 events/hour, CPAP treatment is initiated. In patients with mild  
23  
24 179 disease, defined as AHI 5-14 events/hour, CPAP is only advised in presence of clinically  
25  
26 180 significant symptoms such as excessive sleepiness and unrefreshing sleep(34). In patients  
27  
28 181 where an AHI of <5 events/hour is observed, OSA is excluded and no additional  
29  
30 182 perioperative precautions are needed. [Figure 1] In mild, moderate and severe disease,  
31  
32 183 automatic or bi-level continuous airway pressure (APAP and BiPAP) are considered  
33  
34 184 qualitatively equal, compared to CPAP. Therefore, if CPAP treatment is unsuccessful, APAP  
35  
36 185 and BiPAP are also defined as optimal treatment in the perioperative phase.  
37  
38  
39  
40  
41

42 186

### 44 187 **Enhanced Recovery After Bariatric Surgery Protocols**

45  
46  
47 188 All participating hospitals will use per- and postoperative protocols during the study period  
48  
49 189 that are based on the principles of Enhanced Recovery After Bariatric Surgery (ERABS)(35).  
50  
51  
52 190 These principles underline aspects of care that enable quick recovery after surgery to  
53  
54 191 minimize per- and postoperative opioid administration and to stimulate early postoperative  
55  
56 192 mobilization. To prepare patients for the bariatric procedure and the associated lifestyle  
57  
58 193 changes, all centers have comparable pre-and postoperative programs for bariatric care. This  
59  
60

1  
2  
3 194 enlarges a patients' knowledge and expectations on the procedure, the admission and alarm  
4  
5 195 signs for adverse events.  
6  
7

8 196  
9

### 10 197 **Surgical procedures**

11  
12  
13 198 Laparoscopic Roux-en-Y gastric bypass (LRYGB) is the most performed procedure in all  
14  
15 199 participating hospitals, followed by laparoscopic sleeve gastrectomy (LSG). No other primary  
16  
17 200 procedures are performed in the participating hospitals. LRYGB and LSG are both stomach-  
18  
19 201 reducing procedures, and thus induce significant restriction on food intake. Both procedures  
20  
21 202 influence metabolic and hormonal responses that additionally contribute to weight loss.  
22  
23 203 Furthermore, LRYGB has an additional malabsorptive element as food bypasses the  
24  
25 204 duodenum and a part of the ileum. Both procedures are performed in a protocolled fashion  
26  
27 205 and will be very similar in all participating hospitals.  
28  
29  
30  
31

32 206  
33  
34

### 35 207 **Primary outcomes**

36  
37 208 Cost-effectiveness of CPOX compared with standard care with PPG is the primary outcome  
38  
39 209 and will be evaluated during the period from baseline to 12 months after surgery.  
40  
41 210 Effectiveness of perioperative care (e.g. CPOX and PPG) will be expressed in quality-  
42  
43 211 adjusted-life-years (QALYs). The QALYs will be calculated using the EuroQol 5 Dimensions – 3  
44  
45 212 level (EQ-5D-3L) questionnaire, which rates a person's autonomy and well-being on 5 scales;  
46  
47 213 mobility, self-care, usual activities, pain/discomfort and anxiety/depression(36). Additionally,  
48  
49 214 patients indicate their general health of that day on a Visual Analog Scale (VAS). The EQ-5D  
50  
51 215 score creates a so called utility between 0-1, indicating 1 as the highest form of well-being,  
52  
53 216 and 0 as the lowest form of well-being, i.e. death.  
54  
55  
56  
57  
58  
59  
60

1  
2  
3 217 Direct and indirect costs during the entire study period will be assessed for each individual  
4  
5 218 study subject. Direct costs will be extracted from hospital files and electronic patient  
6  
7  
8 219 records. These costs will be carefully evaluated with regard to the relationship with obesity  
9  
10 220 or OSA. Any unrelated costs will not be considered for the cost-effectiveness analysis.  
11  
12  
13 221 Uncertainty regarding the involvement of OSA or obesity on certain health care costs will be  
14  
15 222 resolved by discussion between authors SvV, EJH and KK. In addition, we aim to collect  
16  
17 223 health care costs outside the hospital and so called indirect costs which refer to lost  
18  
19 224 resources and opportunities (for instance inability to work) resulting from OSA. These costs  
20  
21 225 will be evaluated using two questionnaires: the Productivity Costs Questionnaire (PCQ) and  
22  
23 226 the Medical Costs Questionnaire (MCQ). The PCQ is a validated questionnaire that assesses  
24  
25 227 the relationship of general income and productivity to physical and mental well-being (37).  
26  
27 228 The MCQ is used to measure extramural medical costs, e.g. visits to a general practitioner or  
28  
29 229 dietician, or medical care in another hospital than the bariatric center. The PCQ and MCQ  
30  
31 230 questionnaires are conducted at 3 and 12 months postoperatively.  
32  
33  
34  
35  
36  
37  
38  
39

### 40 232 **Secondary outcomes**

41  
42 233 Mortality, morbidity, complications, intensive care unit (ICU) admissions, length of hospital  
43  
44 234 stay, OSA-related symptoms, adherence to CPAP and quality of life (QOL) are all secondary  
45  
46 235 outcomes.

47  
48  
49 236 Baseline morbidity will be documented and remission of OSA evaluated after 12 months in  
50  
51 237 the patient files, e.g. comorbidities resolution and weight loss progression during the first  
52  
53 238 postoperative year. Weight loss will be expressed as percentage excessive weight loss  
54  
55 239 (%EWL), percentage total weight loss (%TWL) and change in BMI.  
56  
57  
58  
59  
60

1  
2  
3 241 Complications  
4

5 242 All complications that occur within 30 days of the bariatric procedure will be analyzed.  
6  
7

8 243 Distinction will be made in each complication whether it could be caused by (untreated)  
9

10 244 OSA; this will mainly entail pulmonary, cardiac, thromboembolic and neurovascular  
11

12 245 complications. Uncertainty regarding these decisions will be solved by discussion between  
13

14 246 authors SvV, EJH en KK. If the authors conclude that a pulmonary, cardiac, thromboembolic  
15

16 247 or neurovascular complication is not a result of OSA, this will be described in the manuscript.  
17

18 248 Severity of complications will be registered according to the Clavien-Dindo Classification  
19

20 249 (38).  
21  
22

23 250  
24  
25

26  
27 251 Quality of life (QOL)  
28

29 252 Generic QOL will be measured using the EQ-5D-3L, and the Rand-Short Form 36-items  
30

31 253 questionnaire, which assesses general health in nine different aspects, including physical  
32

33 254 activity and bodily pain(39). Sleep-related QOL will be assessed with the Functional Outcome  
34

35 255 Sleep Questionnaire-10(40). This 10-item questionnaire measures the effect of tiredness and  
36

37 256 sleepiness on QOL and scores are obtained through a 4-point Likert scale. The outcome  
38

39 257 score ranges from 5 to 20: low scores indicate poor QOL that is greatly influenced by  
40

41 258 daytime sleepiness, while high scores inversely indicate good QOL uninfluenced by daytime  
42

43 259 sleepiness(41).  
44  
45

46 260  
47  
48

49 261 OSA-related outcomes  
50  
51

52 262 The main symptom of OSA, daytime sleepiness, will be assessed by the Epworth Sleepiness  
53

54 263 Scale questionnaire(42). Patients report the likelihood of falling asleep during eight daytime  
55  
56  
57  
58  
59  
60

1  
2  
3 264 activities on a Likert scale of 0-3, indicating results that range from normal daytime  
4  
5 265 sleepiness (score 0-5) to severe excessive daytime sleepiness (score 16-24).  
6  
7  
8 266 Pre- and postoperative PGs (or PSGs) during the study period will be analyzed for AHI, AHI in  
9  
10 267 supine position, oxygen desaturation index, total sleeping time in supine position, mean  
11  
12 268 oxygen saturation, lowest oxygen saturation, time of saturation <90% SpO<sub>2</sub>, number of  
13  
14 269 episodes of saturation <90% SpO<sub>2</sub> and number of episodes with >4% saturation drop below  
15  
16 270 mean saturation. Additional factors that could contribute to disease-load or probability are  
17  
18 271 also monitored; previous ENT surgery that provides a wider pharyngeal girth (i.e.  
19  
20 272 uvulopalatopharyngoplasty), smoking status and daily use of opioids will also be registered.  
21  
22  
23  
24  
25  
26  
27

#### 274 CPAP adherence

275 Due to known discrepancies between patient reported adherence to treatment and  
276 objective treatment adherence data, we will obtain both objective and subjective data on  
277 CPAP adherence. Adherence will be expressed in days per week of CPAP treatment and  
278 hours per night. To obtain objective data, we will consult online databanks for collection of  
279 day-to-day adherence rates. CPAP devices automatically send adherence data and  
280 corresponding AHIs to an online databank, which health care providers in the Netherlands  
281 use to monitor their patients. In addition, electronic patient records will be evaluated for  
282 physicians' recommendation regarding (dis)continuation of CPAP during follow-up.  
283 Subjective data on CPAP adherence will be collected through patient reported outcomes  
284 measurements. By using questionnaires, insight can be obtained regarding patients' motives  
285 for treatment discontinuation.

286

#### 287 **Data management**



1  
2  
3 288 Handling of data was prospectively addressed in a data management plan with the aim of  
4  
5 289 generating data in accordance with the FAIR criteria: Findable, Accessible, Intra-operable  
6  
7  
8 290 and Reusable.  
9

10 291

### 11 292 **Sample size calculation**

12  
13  
14  
15 293 A non-inferiority design was chosen to evaluate whether CPOX with no preoperative PG is  
16  
17 294 non-inferior to preoperative PG in bariatric patients. In patients with moderate or severe  
18  
19 295 OSA, CPAP treatment is part of standard care. The primary outcome is QALY difference  
20  
21 296 compared to costs, where QALYs are measured by the EQ-5D. Therefore, the sample size  
22  
23 297 calculation is based on a predefined non-inferiority margin of 0.03 on the EQ-5D score.  
24  
25

26  
27 298 Based on an EQ-5D score of 0.68 in the usual care group, QALYs of OSA patients before and  
28  
29 299 after one year of CPAP treatment, and calculating with 80% power to detect the predefined  
30  
31 300 non-inferiority margin at a one-sided a level of 0.05, there are 621 patients needed in each  
32  
33 301 study group(43). Assuming a loss to follow up of 10%, the total study population will be set  
34  
35 302 at 1380 patients, resulting in 690 patients per arm.  
36  
37  
38  
39

40 303

### 41 304 **Analysis of primary outcome measures**

42  
43  
44 305 An extensive cost-effectiveness analysis (CEA) and budget impact analysis (BIA) will be  
45  
46 306 performed. We aim to perform a trial based economic evaluation in which we do not  
47  
48 307 extrapolate costs and effect outside the study period. The effect of the CEA will be expressed  
49  
50 308 in change of QALYs during the study period, and this outcome will be compared to the total  
51  
52 309 costs of each individual patient. Outcomes will be average cost per patient, differences  
53  
54 310 between groups and incremental costs per QALY.  
55  
56  
57  
58  
59  
60

1  
2  
3 311 Sensitivity analysis will be carried out to correct all potential confounders, such as gender,  
4  
5 312 age, preoperative BMI, comorbidities, choice of bariatric center, intraoperative and  
6  
7 313 postoperative administered opioids, smoking status, previous ENT surgery.  
8  
9

10 314

### 11 315 **Analysis of secondary outcome measures**

12  
13 316 Baseline characteristics of patients will be documented with mean/standard deviation or  
14  
15 317 median/range, depending on normality. The number of desaturations, both  
16  
17 318 cardiopulmonary and general complications, interventions, total hospital stay and total costs  
18  
19 319 between both groups will be analyzed with the independent t-test/Mann-Whitney U test.  
20  
21 320 Compliance of CPAP and opioids use will be evaluated with chi-square testing. Mixed model  
22  
23 321 analysis will be performed to evaluate the weight loss, severity of OSA symptoms and CPAP  
24  
25 322 adherence at different time points. Predictive values for cardiopulmonary complications will  
26  
27 323 be evaluated with logistic regression analysis, starting with a univariate analysis. All variables  
28  
29 324 with a significance level  $p < 0.2$  will be included in a multivariate analysis. Within this  
30  
31 325 analysis, only seven independent variables may be included as ten event cases are allowed  
32  
33 326 per dependent predictor. Statistical significance is defined as  $p < 0.05$ .  
34  
35  
36  
37  
38  
39  
40  
41

42 327

### 43 328 **Loss to follow-up or replacement of participants**

44  
45 329 Study participants will be replaced with new participants in case of A) cancellation of the  
46  
47 330 surgery, B) uncompleted preoperative questionnaire, or C) when positive airway pressure  
48  
49 331 treatment is switched to a different modality such as a mandibular advancement device.  
50  
51 332 Patients who do not complete the postoperative questionnaire at 12 months after surgery  
52  
53 333 due to other reasons, will be considered lost-to-follow-up.  
54  
55  
56  
57  
58  
59

60 334

1  
2  
3 335 **Patient and public involvement**  
4

5 336 A non-profit organization for OSA patients was consulted during the process of writing the  
6  
7  
8 337 protocol.  
9

10 338

11  
12  
13 339 **Ethics and dissemination**  
14

15 340 The Medical Ethics Committee United (MEC-U) approved this study, in accordance with the  
16  
17 341 Dutch law Medical Research Involving Human Subjects Act (WMO), Medical Research in  
18  
19 342 Humans (MEC-U, W17.050). In addition, local Medical Ethics Committees of each  
20  
21 343 participating hospital also reviewed and approved the study protocol.  
22  
23  
24

25 344

26  
27 345 Findings of the POPCORN study will be disseminated to all disciplines that are involved in  
28  
29 346 care for bariatric surgery, through articles in peer-reviewed journals, national and  
30  
31 347 international congresses, and revising the national guidelines of the Netherlands.  
32  
33  
34

35 348

36 349

37 350 **DISCUSSION**  
38

39  
40 351 The POPCORN study is a prospective observational cohort study that evaluates the cost-  
41  
42 352 effectiveness of two strategies of perioperative care in bariatric patients without a pre-  
43  
44 353 existent OSA diagnosis: CPOX without extensive preoperative OSA screening vs. mandatory  
45  
46 354 PG, potentially followed by CPAP treatment. The outcomes will enable the development of  
47  
48 355 new, evidence-based guidelines on perioperative care for bariatric patients with no known  
49  
50 356 OSA. The secondary outcomes, such as (cardiopulmonary) complications, OSA-related  
51  
52 357 symptoms and quality of life, will provide an overview of the correlation between cost-  
53  
54  
55  
56  
57  
58  
59  
60

1  
2  
3 358 effectiveness and clinical outcomes that are highly relevant in the decision making for  
4  
5 359 perioperative care in bariatric patients.  
6  
7

8 360 Best practice regarding perioperative care in bariatric patient has been an ongoing  
9  
10 361 debate for many years, with high prevalence and potential detrimental effects of undetected  
11  
12 362 OSA on one side and substantial costs of related perioperative care and CPAP treatment on  
13  
14 363 the other(27, 44, 45). No comparative studies between different perioperative strategies  
15  
16 364 have been conducted to evaluate outcomes of postoperative complications or cost-  
17  
18 365 effectiveness. In a recent review, conducted by the US preventative task force, no  
19  
20 366 effectiveness of OSA screening in patients who are asymptomatic or who experience  
21  
22 367 unrecognized symptoms was found(27). Despite improvements in intermediate outcomes  
23  
24 368 such as AHI or sleepiness symptoms, no improvement in final health outcomes have been  
25  
26 369 demonstrated, such as mortality or serious adverse events. The paucity in evidence  
27  
28 370 regarding beneficial outcomes is especially relevant when cost-effectiveness is regarded. The  
29  
30 371 obesity epidemic and its related costs are continuously expanding, and this underlines the  
31  
32 372 need for optimal use of available health care resources. With no confirmative data on  
33  
34 373 positive influence of OSA screening in bariatric patients with no known OSA, and  
35  
36 374 approximately 700.000 bariatric procedures annually worldwide, clarification on this topic is  
37  
38 375 needed.  
39  
40  
41  
42  
43  
44  
45  
46

47 376 The perioperative strategies evaluated in the POPCORN study are both widely used in  
48  
49 377 general practice and it is expected that results of this study will lead to evidence-based  
50  
51 378 recommendations and guidelines.  
52  
53

54 379 The strength of this study is that a general, bariatric population is evaluated. In both  
55  
56 380 cohorts, large groups of bariatric patients are prospectively observed, while little exclusion  
57  
58 381 criteria are applied. In addition, the follow-up period in this study that investigates a  
59  
60

1  
2  
3 382 perioperative intervention is relatively long. Previous studies that describe preoperative  
4  
5 383 assessment and treatment of OSA mainly reported prevalence of newly detected OSA and  
6  
7  
8 384 related adverse outcomes restricted to the direct perioperative period(46). The follow-up  
9  
10 385 duration of one year after surgery enables us to investigate long-term clinical outcomes of a  
11  
12  
13 386 perioperative regime. Interesting comparisons are to be made between the preoperatively  
14  
15 387 diagnosed OSA patients and the unscreened bariatric patients in terms of sleepiness  
16  
17  
18 388 symptoms, daytime productivity, general quality of life and health care resource utilization.

19  
20 389 Ideally, a randomized controlled trial would have been conducted, in which all  
21  
22  
23 390 patients would undergo a preoperative PG. Consecutive randomization would have  
24  
25 391 determined the type of perioperative care: CPOX monitoring or treatment based on the PG  
26  
27  
28 392 outcome. However, this was considered unethical, as randomization into the CPOX cohort  
29  
30 393 would result in withholding appropriate treatment from patients with confirmed OSA  
31  
32  
33 394 diagnosis, which is associated with many health care hazards (30, 31, 47). Despite the non-  
34  
35 395 randomized design of the POPCORN trial, the large sample size will provide sufficient data to  
36  
37 396 render a balanced statement that will be representable for the general bariatric population  
38  
39  
40 397 in the Netherlands. Furthermore, it is expected that implementation of these perioperative  
41  
42 398 strategies is also feasible in countries other than the Netherlands.

43  
44 399  
45  
46  
47 400 In conclusion, the POPCORN study will conclude which perioperative strategy is most  
48  
49 401 cost-effective for obese patients scheduled for bariatric surgery and who have an unknown  
50  
51  
52 402 OSA status. These data will contribute to evidence-based guidelines which are urgently  
53  
54 403 needed in this particular field of bariatric care.

55  
56  
57 404

58  
59 405 **Author contributions**

1  
2  
3 406 EJH conceived and designed the study, with support of CALDR and KK. SVV wrote and  
4  
5 407 developed the protocol together with EJH, CALDR, KK, GJWF and LR. EJH is the principal  
6  
7 408 investigator and SVV is the main investigator. All authors critically reviewed the content and  
8  
9 409 approved the final manuscript.  
10  
11  
12

13 410  
14 411 **Acknowledgements**

15  
16 412 We would like to thank our collaborators (e.i. clinical Investigators) who are contributing  
17  
18 413 greatly to the POPCORN study. All collaborators are involved in recruitment and care of  
19  
20 414 study participants: dr. M.J. Wiezer, Department of Surgery, St. Antonius Hospital,  
21  
22 415 Nieuwegein, the Netherlands; dr. S.M.M. de Castro, Department of Surgery, OLVG,  
23  
24 416 Amsterdam, the Netherlands; dr. R.N. van Veen, Department of Surgery, OLVG, Amsterdam,  
25  
26 417 the Netherlands; dr. D.J. Swank, Dutch Obesity Clinic, the Hague, the Netherlands, dr. A.  
27  
28 418 Demirkiran, Department of Surgery, Rode Kruis Hospital, Beverwijk, the Netherlands, dr. E.G.  
29  
30 419 Boerma, Department of Surgery, Zuyderland Hospital, Heerlen; dr. F.M.H. van Dielen,  
31  
32 420 Department of Surgery, Máxima Medical Center, Veldhoven, the Netherlands.  
33  
34  
35  
36  
37  
38  
39  
40

41 421  
42 422 **Funding**

43 423 This work was supported by ZonMw, grant number '843004110'.  
44  
45  
46  
47

48 424  
49 425 **Competing interests**

50 426 Not applicable for any of the authors  
51  
52  
53  
54  
55  
56  
57  
58  
59  
60

1  
2  
3 430  
4  
5  
6 431  
7 432  
8 433  
9  
10  
11  
12  
13  
14  
15  
16  
17  
18  
19  
20  
21  
22  
23  
24  
25  
26  
27  
28  
29  
30  
31  
32  
33  
34  
35  
36  
37  
38  
39  
40  
41  
42  
43  
44  
45  
46  
47  
48  
49  
50  
51  
52  
53  
54  
55  
56  
57  
58  
59  
60

For peer review only

434 **References**

- 435
- 436 1. WHO. Obesity and overweight; Fact sheet. . 2018.
- 437 2. Buchwald H, Avidor Y, Braunwald E, Jensen MD, Pories W, Fahrbach K, et al. Bariatric
- 438 surgery: a systematic review and meta-analysis. *Jama*. 2004;292(14):1724-37.
- 439 3. Maciejewski ML, Arterburn DE, Van Scoyoc L, Smith VA, Yancy WS, Jr., Weidenbacher
- 440 HJ, et al. Bariatric Surgery and Long-term Durability of Weight Loss. *JAMA surgery*.
- 441 2016;151(11):1046-55.
- 442 4. Young T, Skatrud J, Peppard PE. Risk factors for obstructive sleep apnea in adults.
- 443 *Jama*. 2004;291(16):2013-6.
- 444 5. Peppard PE, Young T, Palta M, Dempsey J, Skatrud J. Longitudinal study of moderate
- 445 weight change and sleep-disordered breathing. *Jama*. 2000;284(23):3015-21.
- 446 6. Sateia MJ. International classification of sleep disorders-third edition: highlights and
- 447 modifications. *Chest*. 2014;146(5):1387-94.
- 448 7. Giles TL, Lasserson TJ, Smith BJ, White J, Wright J, Cates CJ. Continuous positive
- 449 airways pressure for obstructive sleep apnoea in adults. The Cochrane database of
- 450 systematic reviews. 2006(1):CD001106.
- 451 8. de Raaff CA, Pierik AS, Coblijn UK, de Vries N, Bonjer HJ, van Wagenveld BA. Value of
- 452 routine polysomnography in bariatric surgery. *Surgical endoscopy*. 2017;31(1):245-8.
- 453 9. Peromaa-Haavisto P, Tuomilehto H, Kossi J, Virtanen J, Luostarinen M, Pihlajamaki J,
- 454 et al. Prevalence of Obstructive Sleep Apnoea Among Patients Admitted for Bariatric
- 455 Surgery. A Prospective Multicentre Trial. *Obesity surgery*. 2016;26(7):1384-90.
- 456 10. Peppard PE, Young T, Barnet JH, Palta M, Hagen EW, Hla KM. Increased prevalence of
- 457 sleep-disordered breathing in adults. *American journal of epidemiology*. 2013;177(9):1006-
- 458 14.
- 459 11. Hudgel DW, Patel SR, Ahasic AM, Bartlett SJ, Bessesen DH, Coaker MA, et al. The Role
- 460 of Weight Management in the Treatment of Adult Obstructive Sleep Apnea. An Official
- 461 American Thoracic Society Clinical Practice Guideline. *American journal of respiratory and*
- 462 *critical care medicine*. 2018;198(6):e70-e87.
- 463 12. Young T, Peppard PE, Gottlieb DJ. Epidemiology of obstructive sleep apnea: a
- 464 population health perspective. *American journal of respiratory and critical care medicine*.
- 465 2002;165(9):1217-39.
- 466 13. Sarkhosh K, Switzer NJ, El-Hadi M, Birch DW, Shi X, Karmali S. The impact of bariatric
- 467 surgery on obstructive sleep apnea: a systematic review. *Obesity surgery*. 2013;23(3):414-
- 468 23.
- 469 14. Ravesloot MJ, Hilgevoord AA, van Wagenveld BA, de Vries N. Assessment of the
- 470 effect of bariatric surgery on obstructive sleep apnea at two postoperative intervals. *Obesity*
- 471 *surgery*. 2014;24(1):22-31.
- 472 15. de Raaff CA, Coblijn UK, Ravesloot MJ, de Vries N, de Lange-de Klerk ES, van
- 473 Wagenveld BA. Persistent moderate or severe obstructive sleep apnea after laparoscopic
- 474 Roux-en-Y gastric bypass: which patients? *Surgery for obesity and related diseases : official*
- 475 *journal of the American Society for Bariatric Surgery*. 2016;12(10):1866-72.
- 476 16. van Veldhuisen SL, Hazebroek EJ. Obstructive Sleep Apnea in Adults. *The New*
- 477 *England journal of medicine*. 2019;381(3):e7.
- 478 17. Singh M, Liao P, Kobah S, Wijeysondera DN, Shapiro C, Chung F. Proportion of surgical
- 479 patients with undiagnosed obstructive sleep apnoea. *British journal of anaesthesia*.
- 480 2013;110(4):629-36.



- 1  
2  
3 481 18. Kaw R, Michota F, Jaffer A, Ghamande S, Auckley D, Golish J. Unrecognized sleep  
4 482 apnea in the surgical patient: implications for the perioperative setting. *Chest*.  
5 483 2006;129(1):198-205.
- 7 484 19. Kaw R, Chung F, Pasupuleti V, Mehta J, Gay PC, Hernandez AV. Meta-analysis of the  
8 485 association between obstructive sleep apnoea and postoperative outcome. *British journal of*  
9 486 *anaesthesia*. 2012;109(6):897-906.
- 10 487 20. Flancbaum L, Belsley S. Factors affecting morbidity and mortality of Roux-en-Y gastric  
11 488 bypass for clinically severe obesity: an analysis of 1,000 consecutive open cases by a single  
12 489 surgeon. *Journal of gastrointestinal surgery : official journal of the Society for Surgery of the*  
14 490 *Alimentary Tract*. 2007;11(4):500-7.
- 15 491 21. van Veldhuisen SL, Arslan I, Deden LN, Aarts EO, Hazebroek EJ. Safety of Continuous  
16 492 Postoperative Pulse Oximetry Monitoring Without Obstructive Sleep Apnea Screening in >  
17 493 5000 Patients Undergoing Bariatric Surgery. *Obesity surgery*. 2019.
- 19 494 22. O'Reilly E, Doherty L, O'Boyle C. How Relevant Is Pre-operative Obstructive Sleep  
20 495 Apnoea in the Asymptomatic Bariatric Surgery Patient? *Obesity surgery*. 2019.
- 21 496 23. Meurgey JH, Brown R, Woroszył-Chrusciel A, Steier J. Peri-operative treatment of  
22 497 sleep-disordered breathing and outcomes in bariatric patients. *Journal of thoracic disease*.  
24 498 2018;10(Suppl 1):S144-S52.
- 25 499 24. de Raaff CAL, Gorter-Stam MAW, de Vries N, Sinha AC, Jaap Bonjer H, Chung F, et al.  
26 500 Perioperative management of obstructive sleep apnea in bariatric surgery: a consensus  
27 501 guideline. *Surgery for obesity and related diseases : official journal of the American Society*  
28 502 *for Bariatric Surgery*. 2017;13(7):1095-109.
- 30 503 25. Chiu HY, Chen PY, Chuang LP, Chen NH, Tu YK, Hsieh YJ, et al. Diagnostic accuracy of  
31 504 the Berlin questionnaire, STOP-BANG, STOP, and Epworth sleepiness scale in detecting  
32 505 obstructive sleep apnea: A bivariate meta-analysis. *Sleep medicine reviews*. 2017;36:57-70.
- 33 506 26. Turnbull CD, Stradling JR. To screen or not to screen for obstructive sleep apnea, that  
34 507 is the question. *Sleep medicine reviews*. 2017;36:125-7.
- 36 508 27. Force USPST, Bibbins-Domingo K, Grossman DC, Curry SJ, Davidson KW, Epling JW, Jr.,  
37 509 et al. Screening for Obstructive Sleep Apnea in Adults: US Preventive Services Task Force  
38 510 Recommendation Statement. *Jama*. 2017;317(4):407-14.
- 40 511 28. Weaver TE, Grunstein RR. Adherence to continuous positive airway pressure therapy:  
41 512 the challenge to effective treatment. *Proceedings of the American Thoracic Society*.  
42 513 2008;5(2):173-8.
- 43 514 29. Tregear S, Reston J, Schoelles K, Phillips B. Continuous positive airway pressure  
44 515 reduces risk of motor vehicle crash among drivers with obstructive sleep apnea: systematic  
45 516 review and meta-analysis. *Sleep*. 2010;33(10):1373-80.
- 47 517 30. Somers VK, White DP, Amin R, Abraham WT, Costa F, Culebras A, et al. Sleep apnea  
48 518 and cardiovascular disease: an American Heart Association/American College of Cardiology  
49 519 Foundation Scientific Statement from the American Heart Association Council for High Blood  
50 520 Pressure Research Professional Education Committee, Council on Clinical Cardiology, Stroke  
51 521 Council, and Council on Cardiovascular Nursing. *Journal of the American College of*  
52 522 *Cardiology*. 2008;52(8):686-717.
- 54 523 31. Siccoli MM, Pepperell JC, Kohler M, Craig SE, Davies RJ, Stradling JR. Effects of  
55 524 continuous positive airway pressure on quality of life in patients with moderate to severe  
56 525 obstructive sleep apnea: data from a randomized controlled trial. *Sleep*. 2008;31(11):1551-8.

- 1  
2  
3 526 32. Jonas DE, Amick HR, Feltner C, Weber RP, Arvanitis M, Stine A, et al. Screening for  
4 527 Obstructive Sleep Apnea in Adults: Evidence Report and Systematic Review for the US  
5 528 Preventive Services Task Force. *Jama*. 2017;317(4):415-33.
- 7 529 33. Fried M, Hainer V, Basdevant A, Buchwald H, Deitel M, Finer N, et al. Interdisciplinary  
8 530 European guidelines on surgery of severe obesity. *Obesity facts*. 2008;1(1):52-9.
- 9 531 34. Epstein LJ, Kristo D, Strollo PJ, Jr., Friedman N, Malhotra A, Patil SP, et al. Clinical  
10 532 guideline for the evaluation, management and long-term care of obstructive sleep apnea in  
11 533 adults. *Journal of clinical sleep medicine : JCSM : official publication of the American*  
12 534 *Academy of Sleep Medicine*. 2009;5(3):263-76.
- 14 535 35. Thorell A, MacCormick AD, Awad S, Reynolds N, Roulin D, Demartines N, et al.  
15 536 Guidelines for Perioperative Care in Bariatric Surgery: Enhanced Recovery After Surgery  
16 537 (ERAS) Society Recommendations. *World journal of surgery*. 2016;40(9):2065-83.
- 18 538 36. Brooks R. EuroQol: the current state of play. *Health policy*. 1996;37(1):53-72.
- 19 539 37. Bouwmans C, Krol M, Severens H, Koopmanschap M, Brouwer W, Hakkaart-van  
20 540 Roijen L. The iMTA Productivity Cost Questionnaire: A Standardized Instrument for  
21 541 Measuring and Valuing Health-Related Productivity Losses. *Value in health : the journal of*  
22 542 *the International Society for Pharmacoeconomics and Outcomes Research*. 2015;18(6):753-  
23 543 8.
- 25 544 38. Dindo D, Demartines N, Clavien PA. Classification of surgical complications: a new  
26 545 proposal with evaluation in a cohort of 6336 patients and results of a survey. *Annals of*  
27 546 *surgery*. 2004;240(2):205-13.
- 29 547 39. Brazier J, Roberts J, Deverill M. The estimation of a preference-based measure of  
30 548 health from the SF-36. *Journal of health economics*. 2002;21(2):271-92.
- 31 549 40. Chasens ER, Ratcliffe SJ, Weaver TE. Development of the FOSQ-10: a short version of  
32 550 the Functional Outcomes of Sleep Questionnaire. *Sleep*. 2009;32(7):915-9.
- 34 551 41. Weaver TE, Laizner AM, Evans LK, Maislin G, Chugh DK, Lyon K, et al. An instrument  
35 552 to measure functional status outcomes for disorders of excessive sleepiness. *Sleep*.  
36 553 1997;20(10):835-43.
- 37 554 42. Johns MW. A new method for measuring daytime sleepiness: the Epworth sleepiness  
38 555 scale. *Sleep*. 1991;14(6):540-5.
- 40 556 43. McMillan A, Bratton DJ, Faria R, Laskawiec-Szkonter M, Griffin S, Davies RJ, et al.  
41 557 Continuous positive airway pressure in older people with obstructive sleep apnoea  
42 558 syndrome (PREDICT): a 12-month, multicentre, randomised trial. *The Lancet Respiratory*  
43 559 *medicine*. 2014;2(10):804-12.
- 45 560 44. Zaremba S, Mojica JE, Eikermann M. Perioperative sleep apnea: a real problem or did  
46 561 we invent a new disease? *F1000Research*. 2016;5.
- 47 562 45. Nepomnayshy D, Hesham W, Erickson B, MacDonald J, Iorio R, Brams D. Sleep apnea:  
48 563 is routine preoperative screening necessary? *Obesity surgery*. 2013;23(3):287-91.
- 49 564 46. de Raaff CA, Coblijn UK, de Vries N, van Wagenveld BA. Is fear for postoperative  
50 565 cardiopulmonary complications after bariatric surgery in patients with obstructive sleep  
51 566 apnea justified? A systematic review. *American journal of surgery*. 2016;211(4):793-801.
- 53 567 47. George CF. Reduction in motor vehicle collisions following treatment of sleep apnoea  
54 568 with nasal CPAP. *Thorax*. 2001;56(7):508-12.
- 55 569  
56 570  
57 571  
58 572

1  
2  
3  
4  
5  
6  
7  
8  
9  
10  
11  
12  
13  
14  
15  
16  
17  
18  
19  
20  
21  
22  
23  
24  
25  
26  
27  
28  
29  
30  
31  
32  
33  
34  
35  
36  
37  
38  
39  
40  
41

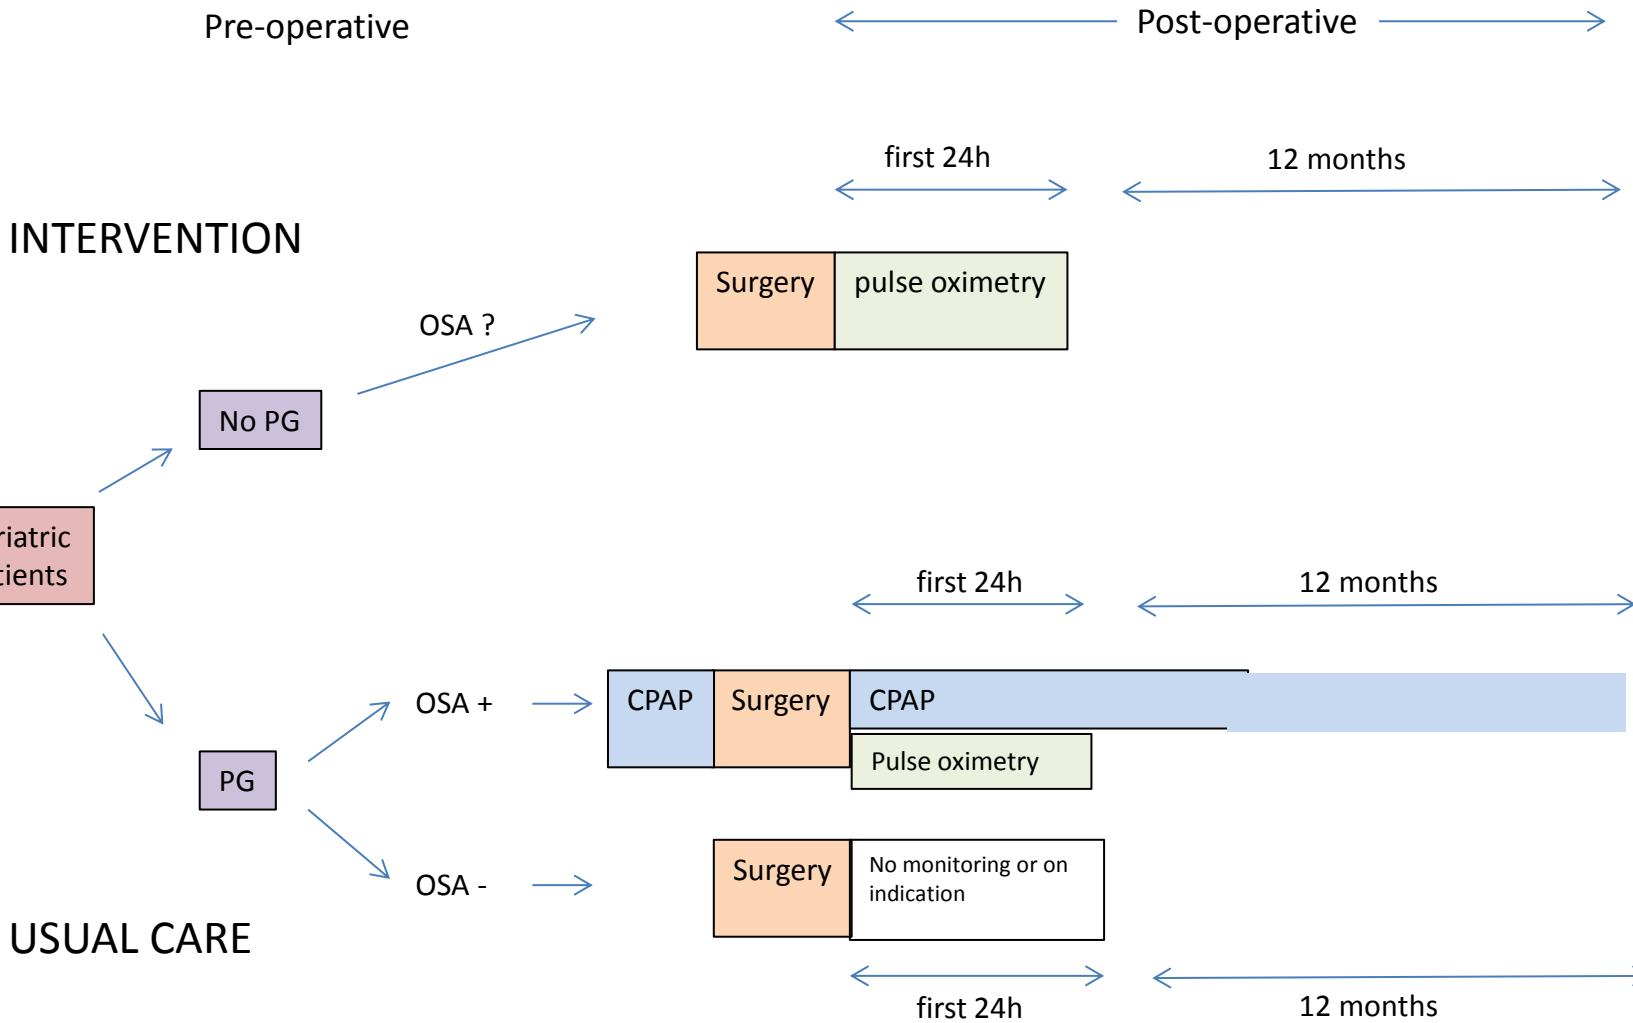

Figure 1. Flowchart of POPCORN study

PG polygraphy, OSA obstructive sleep apnea, CPAP continuous positive airway pressure

STROBE Statement—Checklist of items that should be included in reports of *cohort studies*

|                              | Item No | Recommendation                                                                                                                                                                                                                                                                                                                                                                                                |
|------------------------------|---------|---------------------------------------------------------------------------------------------------------------------------------------------------------------------------------------------------------------------------------------------------------------------------------------------------------------------------------------------------------------------------------------------------------------|
| <b>Title and abstract</b>    | 1       | (a) Indicate the study's design with a commonly used term in the title or the abstract<br>(b) Provide in the abstract an informative and balanced summary of what was done and what was found                                                                                                                                                                                                                 |
| <b>Introduction</b>          |         |                                                                                                                                                                                                                                                                                                                                                                                                               |
| Background/rationale         | 2       | Explain the scientific background and rationale for the investigation being reported                                                                                                                                                                                                                                                                                                                          |
| Objectives                   | 3       | State specific objectives, including any prespecified hypotheses                                                                                                                                                                                                                                                                                                                                              |
| <b>Methods</b>               |         |                                                                                                                                                                                                                                                                                                                                                                                                               |
| Study design                 | 4       | Present key elements of study design early in the paper                                                                                                                                                                                                                                                                                                                                                       |
| Setting                      | 5       | Describe the setting, locations, and relevant dates, including periods of recruitment, exposure, follow-up, and data collection                                                                                                                                                                                                                                                                               |
| Participants                 | 6       | (a) Give the eligibility criteria, and the sources and methods of selection of participants. Describe methods of follow-up<br>(b) For matched studies, give matching criteria and number of exposed and unexposed                                                                                                                                                                                             |
| Variables                    | 7       | Clearly define all outcomes, exposures, predictors, potential confounders, and effect modifiers. Give diagnostic criteria, if applicable                                                                                                                                                                                                                                                                      |
| Data sources/<br>measurement | 8*      | For each variable of interest, give sources of data and details of methods of assessment (measurement). Describe comparability of assessment methods if there is more than one group                                                                                                                                                                                                                          |
| Bias                         | 9       | Describe any efforts to address potential sources of bias                                                                                                                                                                                                                                                                                                                                                     |
| Study size                   | 10      | Explain how the study size was arrived at                                                                                                                                                                                                                                                                                                                                                                     |
| Quantitative variables       | 11      | Explain how quantitative variables were handled in the analyses. If applicable, describe which groupings were chosen and why                                                                                                                                                                                                                                                                                  |
| Statistical methods          | 12      | (a) Describe all statistical methods, including those used to control for confounding<br>(b) Describe any methods used to examine subgroups and interactions<br>(c) Explain how missing data were addressed<br>(d) If applicable, explain how loss to follow-up was addressed<br>(e) Describe any sensitivity analyses                                                                                        |
| <b>Results</b>               |         |                                                                                                                                                                                                                                                                                                                                                                                                               |
| Participants                 | 13*     | (a) Report numbers of individuals at each stage of study—eg numbers potentially eligible, examined for eligibility, confirmed eligible, included in the study, completing follow-up, and analysed<br>(b) Give reasons for non-participation at each stage<br>(c) Consider use of a flow diagram                                                                                                               |
| Descriptive data             | 14*     | (a) Give characteristics of study participants (eg demographic, clinical, social) and information on exposures and potential confounders<br>(b) Indicate number of participants with missing data for each variable of interest<br>(c) Summarise follow-up time (eg, average and total amount)                                                                                                                |
| Outcome data                 | 15*     | Report numbers of outcome events or summary measures over time                                                                                                                                                                                                                                                                                                                                                |
| Main results                 | 16      | (a) Give unadjusted estimates and, if applicable, confounder-adjusted estimates and their precision (eg, 95% confidence interval). Make clear which confounders were adjusted for and why they were included<br>(b) Report category boundaries when continuous variables were categorized<br>(c) If relevant, consider translating estimates of relative risk into absolute risk for a meaningful time period |

|    |                          |    |                                                                                        |
|----|--------------------------|----|----------------------------------------------------------------------------------------|
| 1  | Other analyses           | 17 | Report other analyses done—eg analyses of subgroups and interactions, and              |
| 2  |                          |    | sensitivity analyses                                                                   |
| 3  |                          |    |                                                                                        |
| 4  | <b>Discussion</b>        |    |                                                                                        |
| 5  | Key results              | 18 | Summarise key results with reference to study objectives                               |
| 6  | Limitations              | 19 | Discuss limitations of the study, taking into account sources of potential bias or     |
| 7  |                          |    | imprecision. Discuss both direction and magnitude of any potential bias                |
| 8  |                          |    |                                                                                        |
| 9  | Interpretation           | 20 | Give a cautious overall interpretation of results considering objectives, limitations, |
| 10 |                          |    | multiplicity of analyses, results from similar studies, and other relevant evidence    |
| 11 | Generalisability         | 21 | Discuss the generalisability (external validity) of the study results                  |
| 12 |                          |    |                                                                                        |
| 13 | <b>Other information</b> |    |                                                                                        |
| 14 | Funding                  | 22 | Give the source of funding and the role of the funders for the present study and, if   |
| 15 |                          |    | applicable, for the original study on which the present article is based               |
| 16 |                          |    |                                                                                        |

17  
18 \*Give information separately for exposed and unexposed groups.

19  
20  
21 **Note:** An Explanation and Elaboration article discusses each checklist item and gives methodological background and  
22 published examples of transparent reporting. The STROBE checklist is best used in conjunction with this article (freely  
23 available on the Web sites of PLoS Medicine at <http://www.plosmedicine.org/>, Annals of Internal Medicine at  
24 <http://www.annals.org/>, and Epidemiology at <http://www.epidem.com/>). Information on the STROBE Initiative is  
25 available at <http://www.strobe-statement.org>.

# BMJ Open

**Protocol of a multicentre, prospective cohort study that evaluates cost-effectiveness of two perioperative care strategies for potential obstructive sleep apnea in morbidly obese patients undergoing bariatric surgery.**

|                                 |                                                                                                                                                                                                                                                                                                                                                                                                                                                                                                                                                                                                                                                                                                                                                                                                                                                                                                                                                                                                                                             |
|---------------------------------|---------------------------------------------------------------------------------------------------------------------------------------------------------------------------------------------------------------------------------------------------------------------------------------------------------------------------------------------------------------------------------------------------------------------------------------------------------------------------------------------------------------------------------------------------------------------------------------------------------------------------------------------------------------------------------------------------------------------------------------------------------------------------------------------------------------------------------------------------------------------------------------------------------------------------------------------------------------------------------------------------------------------------------------------|
| Journal:                        | <i>BMJ Open</i>                                                                                                                                                                                                                                                                                                                                                                                                                                                                                                                                                                                                                                                                                                                                                                                                                                                                                                                                                                                                                             |
| Manuscript ID                   | bmjopen-2020-038830.R1                                                                                                                                                                                                                                                                                                                                                                                                                                                                                                                                                                                                                                                                                                                                                                                                                                                                                                                                                                                                                      |
| Article Type:                   | Protocol                                                                                                                                                                                                                                                                                                                                                                                                                                                                                                                                                                                                                                                                                                                                                                                                                                                                                                                                                                                                                                    |
| Date Submitted by the Author:   | 14-Jul-2020                                                                                                                                                                                                                                                                                                                                                                                                                                                                                                                                                                                                                                                                                                                                                                                                                                                                                                                                                                                                                                 |
| Complete List of Authors:       | van Veldhuisen, Sophie; Rijnstate Hospital, Department of Surgery / Vitalys Clinic<br>Kuppens, Kim; St Antonius Hospital, Department of Pulmonary Medicine<br>de Raaff, Christel; Albert Schweitzer Hospital, Department of Surgery<br>Wiezer, René; Sint Antonius Hospital, Surgery<br>de Castro, Steve; OLVG Locatie West, Surgery<br>van Veen, Ruben; OLVG Locatie West, Surgery<br>Swank, Dingeman; Nederlandse Obesitas Kliniek<br>Demirkiran, Ahmet; Rode Kruis Ziekenhuis, Surgery<br>Boerma, Evert-Jan; Zuyderland Medical Centre Heerlen, Surgery<br>Greve, Jan-Willem; Zuyderland Medical Centre Heerlen, Surgery;<br>Maastricht University, Surgery, Nutrim<br>van Dielen, Francois; Maxima Medical Centre, Surgery<br>Frederix, Geert; Universitair Medisch Centrum Utrecht, Department of Public Health, Julius Center Research Program Methodology<br>Hazebroek, Eric; Rijnstate Hospital, Vitalys Clinic, Department of Surgery / Vitalys Clinic; Wageningen University and Research, Division of Human Nutrition and Health |
| <b>Primary Subject Heading</b>: | Surgery                                                                                                                                                                                                                                                                                                                                                                                                                                                                                                                                                                                                                                                                                                                                                                                                                                                                                                                                                                                                                                     |
| Secondary Subject Heading:      | Respiratory medicine                                                                                                                                                                                                                                                                                                                                                                                                                                                                                                                                                                                                                                                                                                                                                                                                                                                                                                                                                                                                                        |
| Keywords:                       | Sleep medicine < ANAESTHETICS, SLEEP MEDICINE, Adult surgery < SURGERY, RESPIRATORY MEDICINE (see Thoracic Medicine)                                                                                                                                                                                                                                                                                                                                                                                                                                                                                                                                                                                                                                                                                                                                                                                                                                                                                                                        |
|                                 |                                                                                                                                                                                                                                                                                                                                                                                                                                                                                                                                                                                                                                                                                                                                                                                                                                                                                                                                                                                                                                             |

SCHOLARONE™  
Manuscripts



I, the Submitting Author has the right to grant and does grant on behalf of all authors of the Work (as defined in the below author licence), an exclusive licence and/or a non-exclusive licence for contributions from authors who are: i) UK Crown employees; ii) where BMJ has agreed a CC-BY licence shall apply, and/or iii) in accordance with the terms applicable for US Federal Government officers or employees acting as part of their official duties; on a worldwide, perpetual, irrevocable, royalty-free basis to BMJ Publishing Group Ltd ("BMJ") its licensees and where the relevant Journal is co-owned by BMJ to the co-owners of the Journal, to publish the Work in this journal and any other BMJ products and to exploit all rights, as set out in our [licence](#).

The Submitting Author accepts and understands that any supply made under these terms is made by BMJ to the Submitting Author unless you are acting as an employee on behalf of your employer or a postgraduate student of an affiliated institution which is paying any applicable article publishing charge ("APC") for Open Access articles. Where the Submitting Author wishes to make the Work available on an Open Access basis (and intends to pay the relevant APC), the terms of reuse of such Open Access shall be governed by a Creative Commons licence – details of these licences and which [Creative Commons](#) licence will apply to this Work are set out in our licence referred to above.

Other than as permitted in any relevant BMJ Author's Self Archiving Policies, I confirm this Work has not been accepted for publication elsewhere, is not being considered for publication elsewhere and does not duplicate material already published. I confirm all authors consent to publication of this Work and authorise the granting of this licence.

1  
2  
3 **1 Protocol of a multicentre, prospective cohort study that evaluates cost-effectiveness of**  
4  
5 **2 two perioperative care strategies for potential obstructive sleep apnea in morbidly obese**  
6  
7 **3 patients undergoing bariatric surgery.**  
8  
9

10  
11  
12  
13 Authors  
14

15 6 Sophie L. van Veldhuisen<sup>1</sup>, Kim Kuppens<sup>2</sup>, Christel A.L. de Raaff<sup>3</sup>, Marinus J. Wiezer<sup>2</sup>, Steve  
16  
17 M.M. de Castro<sup>4</sup>, Ruben N. van Veen<sup>4</sup>, Dingeman J. Swank<sup>5</sup>, Ahmet Demirkiran<sup>6</sup>, Evert-Jan G.  
18  
19 Boerma<sup>7</sup>, Jan Willem M. Greve<sup>7,8</sup>, Francois M.H. van Dielen<sup>9</sup>, Geert W.J. Frederix<sup>10</sup>, Eric J.  
20  
21 Hazebroek<sup>1,11</sup>  
22  
23  
24

25  
26  
27 Affiliations  
28

29  
30 12 <sup>1</sup> Department of Surgery / Vitalys Clinic, Rijnstate Hospital, Arnhem, the Netherlands  
31

32 13 <sup>2</sup> Department of Pulmonary Medicine, St. Antonius Hospital, Utrecht, the Netherlands  
33

34 14 <sup>3</sup> Department of Surgery, Albert Schweitzer Hospital, Dordrecht, the Netherlands  
35

36 15 <sup>4</sup> Department of Surgery, OLVG, Amsterdam, the Netherlands  
37

38 16 <sup>5</sup> Dutch Obesity Clinic, the Hague, the Netherlands  
39

40 17 <sup>6</sup> Department of Surgery, Rode Kruis Hospital, Beverwijk, the Netherlands  
41

42 18 <sup>7</sup> Department of Surgery, Zuyderland Hospital, Heerlen, the Netherlands  
43

44 19 <sup>8</sup> Department of Surgery, Nutrim, Maastricht University, Maastricht, the Netherlands  
45

46 20 <sup>9</sup> Department of Surgery, Máxima Medical Centre, Veldhoven, the Netherlands  
47

48 21 <sup>10</sup> Department of Public Health, Julius Centre Research Program Methodology, University  
49

50 22 Medical Centre Utrecht, Utrecht, the Netherlands  
51

52 23 <sup>11</sup> Division of Human Nutrition and Health, Wageningen University & Research, Wageningen,  
53

54 24 the Netherlands  
55  
56  
57  
58  
59  
60



1  
2  
3  
4  
5  
6  
7  
8  
9  
10  
11  
12  
13  
14  
15  
16  
17  
18  
19  
20  
21  
22  
23  
24  
25  
26  
27  
28  
29  
30  
31  
32  
33  
34  
35  
36  
37  
38  
39  
40  
41  
42  
43  
44  
45  
46  
47  
48  
49  
50  
51  
52  
53  
54  
55  
56  
57  
58  
59  
60

25

26 Corresponding author

27 Sophie L. van Veldhuisen, M.D.

28 Department of Bariatric Surgery

29 Rijnstate Hospital

30 Wagnerlaan 55, 6815 AD

31 Arnhem, the Netherlands

32 Phone: +31630705143

33 Email: [svanveldhuisen@rijnstate.nl](mailto:svanveldhuisen@rijnstate.nl)

34

35 Word count

36 4395

37

For peer review only

## 38 **ABSTRACT**

### 39 **Introduction**

40 Despite the high prevalence of obstructive sleep apnea (OSA) in obese patients undergoing  
41 bariatric surgery, OSA is undiagnosed in the majority of patients and thus untreated. While  
42 untreated OSA is associated with an increased risk of per- and postoperative complications,  
43 no evidence-based guidelines on perioperative care for these patients are available. The aim  
44 of the POPCORN study (*Post-Operative Pulse oximetry without OSA sCreening vs.*  
45 *perioperative continuous positive airway pressure (CPAP) treatment following OSA*  
46 *scReeNing by polygraphy (PG)*) is to evaluate which perioperative strategy is most cost-  
47 effective for obese patients undergoing bariatric surgery without a history of OSA.

### 48 **Methods and analysis**

49 In this multicentre observational cohort study, data from 1380 patients who will undergo  
50 bariatric surgery will be collected. Patients will either receive postoperative care with pulse  
51 oximetry monitoring and supplemental oxygen during the first postoperative night, or they  
52 receive care that includes preoperative PG and CPAP treatment in case of moderate or  
53 severe OSA. Local protocols for perioperative care in each participating hospital will  
54 determine into which cohort a patient is placed. The primary outcome is cost-effectiveness,  
55 which will be calculated by comparing all health care costs to the quality-adjusted-life-years  
56 (QALYs, calculated using EQ-5D questionnaires). Secondary outcomes are mortality,  
57 complications within 30 days after surgery, readmissions, reoperations, length of stay,  
58 weight loss, generic quality of life (QOL), OSA-specific QOL, OSA symptoms and CPAP  
59 adherence. Patients will receive questionnaires before surgery and 1, 3, 6, and 12 months  
60 after surgery to report QALYs and other patient reported outcomes.

### 61 **Ethics and dissemination**

62 Approval from the Medical research Ethics Committees United was granted in accordance  
63 with the Dutch law for Medical Research Involving Human Subjects Act (WMO) (reference  
64 number W17.050). Results will be submitted for publication in peer-reviewed journals and  
65 presented at (inter)national conferences.

#### 66 **Trial registration number**

67 NTR6991, registered at the Netherlands Trial register, <https://www.trialregister.nl>.

#### 70 **Article summary**

##### 71 Strengths and limitations of this study

72 - This is the first prospective study to compare continuous postoperative pulse  
73 oximetry without preoperative OSA screening to routine OSA screening with consequent  
74 CPAP treatment as perioperative care for bariatric patients with potential OSA.

76 - The main outcome of this study is cost-effectiveness of these two perioperative care  
77 strategies in obese patients with no known OSA history.

79 - Results of this study will provide new insights in unknown aspects of perioperative  
80 interventions for undetected OSA, such as the impact on postoperative complications and  
81 general quality of life.

83 - Despite the non-randomized design, we hypothesize that the results are  
84 generalizable to most bariatric centres due to the large sample size and limited exclusion  
85 criteria.

1  
2  
3 86

4  
5 87 - Our follow-up duration of one year enables analysis of long-term outcomes of  
6  
7  
8 88 perioperative interventions for OSA, such as influence on weight loss, sleepiness symptoms,  
9  
10 89 quality of life with sleepiness and adherence to CPAP.  
11

12  
13 90

## 15 91 INTRODUCTION

16  
17 92 Obesity is a health care issue of epidemic proportions that is rapidly increasing. Worldwide,  
18  
19 93 more than 650 million people are affected by obesity, defined as body mass index (BMI)  $\geq 30$   
20  
21 94 kg/m<sup>2</sup>, with subsequent morbidity and mortality(1). Many conservative and life-style  
22  
23 95 interventions that are aimed at reducing weight are available but most lack effectiveness  
24  
25 96 and durable results. To date, bariatric surgery is the only effective treatment for obesity that  
26  
27 97 achieves sustainable, long-term weight loss(2, 3).  
28  
29

30  
31 98 Obesity is the main risk factor for obstructive sleep apnea (OSA), a sleep-breathing  
32  
33 99 disorder with recurrent breathing cessations that occur when the pharyngeal airway  
34  
35 100 collapses completely or partially. These collapses are respectively called apneas and  
36  
37 101 hypopneas. The number of breathing cessations per hour of sleep, the apnea hypopnea  
38  
39 102 index (AHI), indicates the severity of OSA (4, 5). Intermittent hypoxemia, hypercapnia and  
40  
41 103 arousals from sleep are a result of breathing cessations, which lead to excessive daytime  
42  
43 104 sleepiness, cognitive impairment and increased risk of cardiovascular disease. The golden  
44  
45 105 standard for OSA diagnosis is an in-laboratory polysomnography (PSG), but in recent years  
46  
47 106 home-based polygraphy (PG) has also been validated as a diagnostic tool(6). Currently, the  
48  
49 107 best treatment for OSA is positive airway pressure (PAP), most commonly provided as  
50  
51 108 continuous PAP (CPAP), and aims to maintain an open airway during sleep. Hereby, arousals  
52  
53  
54  
55  
56  
57  
58  
59  
60

1  
2  
3 109 from sleep will be reduced, which improves daytime functioning with less excessive  
4  
5 110 sleepiness, as well as quality of life and cognitive functioning(7).

6  
7  
8 111 OSA is highly prevalent in patients who are eligible for bariatric surgery, affecting  
9  
10 112 approximately 60-70%, compared to OSA prevalence of 3-17% in the general adult  
11  
12 113 population(8-10). Due to the strong correlation of OSA and obesity, weight loss should be  
13  
14 114 recommended to all obese patients with moderate or severe OSA(11, 12). Bariatric surgery is  
15  
16 115 highly effective for this disease, as 60-85% patients achieve complete remission of OSA or  
17  
18 116 significant reduction of their disease severity(2, 13-16).

19  
20  
21  
22 117 Perioperative care for bariatric patients with OSA pose a clinical challenge, given that  
23  
24 118 the majority is asymptomatic or experiences unrecognized symptoms, and is consequently  
25  
26 119 untreated(17). Opioids administered during general anesthesia can induce long-lasting  
27  
28 120 apneas in patients with untreated OSA. As a result, (untreated) OSA is associated with a  
29  
30 121 higher risk of cardiopulmonary and neurovascular complications, as well as higher overall  
31  
32 122 mortality and morbidity in general surgery populations(18, 19). Evidence that this  
33  
34 123 phenomenon of increased perioperative risk also exists in bariatric patients is thin, and most  
35  
36 124 studies do not mention whether precautions were taken to prevent OSA-related adverse  
37  
38 125 events(20). More recent prospective studies and reviews demonstrate a consistently low  
39  
40 126 incidence of cardiopulmonary and neurovascular complications following bariatric surgery,  
41  
42 127 and statistical analyses fail to indicate a direct causative link to OSA(21-23).

43  
44  
45 128 Evidence-based guidelines for perioperative care of potential OSA in bariatric  
46  
47 129 patients are lacking(24). Therefore, a wide variety of perioperative modalities has emerged,  
48  
49 130 that all aim to minimize the risk of serious adverse events related to untreated OSA. One of  
50  
51 131 the options is routine preoperative assessment of OSA in every bariatric patient by  
52  
53 132 performing PSG or PG. Newly diagnosed moderate or severe OSA patients will consequently  
54  
55  
56  
57  
58  
59  
60

1  
2  
3 133 be treated with CPAP. Another option relies on questionnaires to identify patients at high  
4  
5 134 risk of OSA who subsequently undergo PG. These questionnaires, such as the STOP-BANG or  
6  
7  
8 135 Berlin questionnaire, are frequently used, but none of these screening tools has been able to  
9  
10 136 render both high sensitivity and specificity. Therefore, its applicability remains  
11  
12  
13 137 controversial(25-27). Another alternative is routine, postoperative continuous monitoring  
14  
15 138 with pulse oximetry with supplemental non-invasive oxygen administration but without  
16  
17  
18 139 preoperative OSA assessment. In this approach, all patients receive the same intervention to  
19  
20 140 achieve adequate saturation levels in the early post-operative phase(21).

21  
22  
23 141 Obesity and obesity-related disorders increasingly demand utilization of available  
24  
25 142 health care resources. Justification of high screening expenses for OSA is debatable given the  
26  
27  
28 143 low incidence of OSA-related complications, despite the high prevalence of OSA. In addition,  
29  
30 144 CPAP adherence rates are poor even in patients with symptomatic OSA, ranging between 29-  
31  
32 145 83%(28). While specific data are lacking, adherence rates are putatively even lower in  
33  
34  
35 146 asymptomatic bariatric patients, which questions the actual protective effect that is added  
36  
37 147 by preoperative initiation of CPAP. In contrast, adequate treatment with CPAP in  
38  
39  
40 148 symptomatic OSA patients positively influences societal costs, as symptomatic patients  
41  
42 149 without treatment use more health care resources, suffer more unemployment and are  
43  
44  
45 150 more prone to work-related or traffic accidents(29-31). However, routine screening and  
46  
47 151 treatment of asymptomatic patients is not likewise supported by conclusive evidence(27,  
48  
49  
50 152 32). Deliberate consideration is needed when comparing outcomes such as safety, costs and  
51  
52 153 patients' satisfaction between different perioperative strategies for OSA care in bariatric  
53  
54 154 patients.

55  
56  
57 155

58  
59 156 **RATIONALE**

1  
2  
3 157 The primary aim of the POPCORN study (*Post-Operative Pulse oximetry without OSA*  
4  
5  
6 158 *s*creening vs. *OSA sc*reeNing) is to evaluate the most cost-effective perioperative strategy  
7  
8 159 for bariatric patients who have no history of OSA. We will compare postoperative  
9  
10 160 continuous pulse oximetry without OSA screening with routine OSA screening by PG and  
11  
12  
13 161 subsequent application of CPAP. This study will provide evidence that will enable clinicians  
14  
15 162 to make an evidence-based decision on perioperative care of patients with no known OSA  
16  
17  
18 163 undergoing bariatric surgery. This paper describes the design and protocol of the POPCORN  
19  
20 164 study.  
21  
22

23 165

## 25 166 **METHODS AND ANALYSIS**

### 27 167 **Study design**

29  
30 168 The POPCORN study is a prospective, multicentre, observational cohort study that evaluates  
31  
32 169 two cohorts of bariatric patients who have no history of OSA. The first cohort consists of  
33  
34  
35 170 patients who are postoperatively monitored with continuous pulse oximetry (CPOX cohort)  
36  
37 171 who do not undergo a PG or PSG. In the second cohort, all bariatric patients undergo a  
38  
39  
40 172 preoperative PG and in case of moderate or severe OSA receive consequent treatment with  
41  
42 173 CPAP before and after surgery (PPG cohort) (Figure 1).  
43  
44

45 174

### 47 175 **Recruitment procedures and consent**

48  
49 176 In total, 1380 obese patients scheduled to undergo bariatric surgery will be included for  
50  
51  
52 177 participation in the POPCORN study. For study participation, a subject must meet the  
53  
54 178 following inclusion criteria: (A) preoperative BMI  $\geq 35$  kg/m<sup>2</sup> combined with an obesity-  
55  
56  
57 179 related comorbidity or preoperative BMI  $\geq 40$  kg/m<sup>2</sup>(33), (B) Age  $\geq 18$  years, (C) undergo a  
58  
59 180 primary bariatric procedure. Potential subjects will be excluded from participating in the  
60

1  
2  
3 181 following situations: (A) previous bariatric surgery, such as laparoscopic adjustable gastric  
4  
5 182 banding; (B) inability to speak or read the Dutch language; (C) concomitantly performed  
6  
7  
8 183 procedures during bariatric surgery that increase the risk of postoperative complications and  
9  
10 184 costs, such as cholecystectomy or paraesophageal hernia repair; (D) Use of treatment  
11  
12  
13 185 options for OSA other than PAP modalities, such as a mandibular advancement device or  
14  
15 186 positional therapy.

17  
18 187 In both cohorts, 690 patients will be included. Local protocols of participating  
19  
20 188 hospitals will determine which strategy of perioperative care is used and this will  
21  
22  
23 189 consequently determine the allocation of patients into one of the two cohorts. Seven  
24  
25 190 hospitals in the Netherlands will collaborate to recruit all study-patients. Of the participating  
26  
27 191 hospitals, the only hospital that applies CPOX without preoperative OSA screening is  
28  
29 192 Rijnstate Hospital, Arnhem, who will recruit patients for the CPOX arm. For the PG cohort,  
30  
31 193 patients are recruited from the other participating hospitals (St. Antonius Hospital,  
32  
33 194 Nieuwegein; Onze Lieve Vrouwe Hospital, Amsterdam; Dutch Obesity Clinic, the Hague;  
34  
35 195 Zuyderland Hospital, Heerlen; Rode Kruis Hospital, Beverwijk and Máxima Medical Centre,  
36  
37 196 Veldhoven). Written or digitally signed informed consent will be obtained from all  
38  
39  
40 197 participants enrolled in this study. Recruitment has started in April 2018 and is expected to  
41  
42  
43 198 be completed in March 2020.

44  
45  
46  
47 199

#### 200 **Continuous pulse oximetry (CPOX) - cohort**

51  
52 201 Bariatric patients in the CPOX cohort receive no preoperative screening for OSA: no PG,  
53  
54 202 polysomnography or questionnaires for risk stratification are conducted. Postoperatively,  
55  
56 203 bariatric patients return to the surgical ward where continuous surveillance with pulse  
57  
58 204 oximetry is immediately started, with supplemental oxygen provided via a nasal cannula (2  
59  
60



1  
2  
3 205 L/min SpO<sub>2</sub>). Pulse oximetry is performed using a Draeger Infinity Delta monitor (Draeger  
4  
5  
6 206 Medical Systems Incorporated, USA). Clinical desaturations are defined as <92% SpO<sub>2</sub>, lasting  
7  
8 207 at least 10 seconds. A desaturation sets off an alarm that alerts the attending nurse who will  
9  
10 208 perform a clinical evaluation. Long-lasting apneas can either be terminated by awaking the  
11  
12  
13 209 respective patient, or by providing additional supplemental oxygen via the non-invasive  
14  
15 210 nasal cannula. In case of a serious desaturation that cannot be managed appropriately by  
16  
17 211 these minor interventions, patients can be admitted to the intensive care unit for potential  
18  
19  
20 212 reintubation at discretion of the treating physician.  
21  
22

213

#### 214 **Preoperative polygraphy (PPG) - cohort**

215 The PPG cohort will consist of bariatric patients that are preoperatively screened for OSA  
216 with a polygraphy or polysomnography. Patients with moderate or severe disease, defined  
217 as AHI $\geq$ 15 and AHI  $\geq$ 30 events/hour, CPAP treatment is initiated. In patients with mild  
218 disease, defined as AHI 5-14 events/hour, CPAP is only advised in presence of clinically  
219 significant symptoms such as excessive sleepiness and unrefreshing sleep(34). In patients  
220 where an AHI of <5 events/hour is observed, OSA is excluded and no additional  
221 perioperative precautions are needed. [Figure 1] In mild, moderate and severe disease,  
222 automatic or bi-level continuous airway pressure (APAP and BiPAP) are considered  
223 qualitatively equal, compared to CPAP. Therefore, if CPAP treatment is unsuccessful, APAP  
224 and BiPAP are also defined as optimal treatment in the perioperative phase.

225

#### 226 **Enhanced Recovery After Bariatric Surgery Protocols**

227 All participating hospitals will use per- and postoperative protocols during the study period  
228 that are based on the principles of Enhanced Recovery After Bariatric Surgery (ERABS)(35).

1  
2  
3 229 These principles underline aspects of care that enable quick recovery after surgery to  
4  
5 230 minimize per- and postoperative opioid administration and to stimulate early postoperative  
6  
7  
8 231 mobilization. To prepare patients for the bariatric procedure and the associated lifestyle  
9  
10 232 changes, all centres have comparable pre-and postoperative programs for bariatric care. This  
11  
12  
13 233 enlarges a patients' knowledge and expectations on the procedure, the admission and alarm  
14  
15 234 signs for adverse events.  
16  
17

235

### 236 **Surgical procedures**

237 Laparoscopic Roux-en-Y gastric bypass (LRYGB) is the most performed procedure in all  
238 participating hospitals, followed by laparoscopic sleeve gastrectomy (LSG). LRYGB and LSG  
239 are both stomach-reducing procedures, and thus induce significant restriction on food  
240 intake. Both procedures influence metabolic and hormonal responses that additionally  
241 contribute to weight loss. Furthermore, LRYGB has an additional malabsorptive element as  
242 food bypasses the duodenum and a part of the ileum. Both procedures are performed in a  
243 protocolled fashion and will be very similar in all participating hospitals.  
244

245

### 245 **Primary outcomes**

246 Cost-effectiveness of CPOX compared with standard care with PPG is the primary outcome  
247 and will be evaluated during the period from baseline to 12 months after surgery from a  
248 societal perspective. Effectiveness of perioperative care (e.g. CPOX and PPG) will be  
249 expressed in quality-adjusted-life-years (QALYs). The QALYs will be calculated using the  
250 EuroQol 5 Dimensions – 3 level (EQ-5D-3L) questionnaire, which rates a person's autonomy  
251 and well-being on 5 scales; mobility, self-care, usual activities, pain/discomfort and  
252 anxiety/depression(36). All scores will be calculated using the subset that was validated for

1  
2  
3 253 the Dutch population of the EQ-5d-3L(37) . Additionally, patients indicate their general  
4  
5  
6 254 health of that day on a Visual Analog Scale (VAS). The EQ-5D score creates a so called utility  
7  
8 255 between 0-1, indicating 1 as the highest form of well-being, and 0 as the lowest form of well-  
9  
10 256 being, i.e. death.

11  
12  
13 257 Direct and indirect costs during the entire study period will be assessed for each individual  
14  
15 258 study subject. Direct costs will be extracted from hospital files and electronic patient  
16  
17 259 records. These costs will be carefully evaluated with regard to the relationship with obesity  
18  
19 260 or OSA. Any unrelated costs will not be considered for the cost-effectiveness analysis.  
20  
21  
22 261 Uncertainty regarding the involvement of OSA or obesity on certain health care costs will be  
23  
24  
25 262 resolved by discussion between authors SvV, EJH and KK.  
26  
27

28 263  
29  
30 264 In addition, we aim to collect health care costs outside the hospital and so called indirect  
31  
32 265 costs which refer to lost resources and opportunities (for instance inability to work) resulting  
33  
34 266 from OSA. These costs will be evaluated using two questionnaires: the Productivity Costs  
35  
36 267 Questionnaire (PCQ) and the Medical Costs Questionnaire (MCQ). The PCQ is a validated  
37  
38 268 questionnaire that assesses the relationship of general income and productivity to physical  
39  
40 269 and mental well-being (38). The MCQ is used to measure extramural medical costs, e.g. visits  
41  
42 270 to a general practitioner or dietician, or medical care in another hospital than the bariatric  
43  
44 271 centre. The PCQ and MCQ questionnaires are conducted at 3 and 12 months  
45  
46 272 postoperatively.  
47  
48  
49

50  
51  
52 273

53  
54 274 **Secondary outcomes**  
55  
56  
57  
58  
59  
60

1  
2  
3 275 Mortality, morbidity, complications, intensive care unit (ICU) admissions, length of hospital  
4  
5 276 stay, OSA-related symptoms, adherence to CPAP and quality of life (QOL) are all secondary  
6  
7  
8 277 outcomes.

9  
10 278 Baseline morbidity will be documented and remission of OSA evaluated after 12 months in  
11  
12  
13 279 the patient files, e.g. comorbidities resolution and weight loss progression during the first  
14  
15 280 postoperative year. Weight loss will be expressed as percentage excessive weight loss  
16  
17 281 (%EWL), percentage total weight loss (%TWL) and change in BMI.

18  
19  
20 282

### 21 22 283 Complications

23  
24  
25 284 All complications that occur within 30 days of the bariatric procedure will be analysed.

26  
27 285 Distinction will be made in each complication whether it could be caused by (untreated)

28  
29 286 OSA; this will mainly entail pulmonary, cardiac, thromboembolic and neurovascular

30  
31 287 complications. Uncertainty regarding these decisions will be solved by discussion between

32  
33 288 authors SvV, EJJ en KK. If the authors conclude that a pulmonary, cardiac, thromboembolic

34  
35 289 or neurovascular complication is not a result of OSA, this will be described in the manuscript.

36  
37 290 Severity of complications will be registered according to the Clavien-Dindo Classification

38  
39 291 (39).

40  
41  
42 292

### 43 44 293 Quality of life (QOL)

45  
46  
47 294 Generic QOL will be measured using the EQ-5D-3L, and the Rand-Short Form 36-items

48  
49 295 questionnaire, which assesses general health in nine different aspects, including physical

50  
51 296 activity and bodily pain(40). Sleep-related QOL will be assessed with the Functional Outcome

52  
53 297 Sleep Questionnaire-10(41). This 10-item questionnaire measures the effect of tiredness and

54  
55 298 sleepiness on QOL and scores are obtained through a 4-point Likert scale. The outcome

56  
57  
58  
59  
60

1  
2  
3 299 score ranges from 5 to 20: low scores indicate poor QOL that is greatly influenced by  
4  
5 300 daytime sleepiness, while high scores inversely indicate good QOL uninfluenced by daytime  
6  
7  
8 301 sleepiness(42).  
9

10 302

11  
12  
13 303 OSA-related outcomes

14  
15 304 The main symptom of OSA, daytime sleepiness, will be assessed by the Epworth Sleepiness  
16  
17 305 Scale questionnaire(43). Patients report the likelihood of falling asleep during eight daytime  
18  
19  
20 306 activities on a Likert scale of 0-3, indicating results that range from normal daytime  
21  
22  
23 307 sleepiness (score 0-5) to severe excessive daytime sleepiness (score 16-24).

24  
25 308 Pre- and postoperative PGs (or PSGs) during the study period will be analysed for AHI, AHI in  
26  
27 309 supine position, oxygen desaturation index, total sleeping time in supine position, mean  
28  
29  
30 310 oxygen saturation, lowest oxygen saturation, time of saturation <90% SpO<sub>2</sub>, number of  
31  
32 311 episodes of saturation <90% SpO<sub>2</sub> and number of episodes with >4% saturation drop below  
33  
34  
35 312 mean saturation. Additional factors that could contribute to disease-load or probability are  
36  
37 313 also monitored; previous ENT surgery that provides a wider pharyngeal girth (i.e.  
38  
39  
40 314 uvulopalatopharyngoplasty), smoking status, alcohol consumption and daily use of opioids  
41  
42 315 and benzodiazepines will also be registered.  
43

44 316

45  
46  
47 317 CPAP adherence

48  
49 318 Due to known discrepancies between patient reported adherence to treatment and  
50  
51  
52 319 objective treatment adherence data, we will obtain both objective and subjective data on  
53  
54  
55 320 CPAP adherence. Adherence will be expressed in days per week of CPAP treatment and  
56  
57 321 hours per night. To obtain objective data, we will consult online databanks for collection of  
58  
59 322 day-to-day adherence rates. CPAP devices automatically send adherence data and  
60

1  
2  
3 323 corresponding AHIs to an online databank, which health care providers in the Netherlands  
4  
5 324 use to monitor their patients. In addition, electronic patient records will be evaluated for  
6  
7  
8 325 physicians' recommendation regarding (dis)continuation of CPAP during follow-up.  
9  
10 326 Subjective data on CPAP adherence will be collected through patient reported outcomes  
11  
12  
13 327 measurements. By using questionnaires, insight can be obtained regarding patients' motives  
14  
15 328 for treatment discontinuation.  
16

17 329

### 20 330 **Data management**

21  
22 331 Handling of data was prospectively addressed in a data management plan with the aim of  
23  
24 332 generating data in accordance with the FAIR criteria: Findable, Accessible, Intra-operable  
25  
26 333 and Reusable.  
27  
28  
29

30 334

### 32 335 **Sample size calculation**

33  
34 336 A non-inferiority design was chosen to evaluate whether CPOX with no preoperative PG is  
35  
36 337 non-inferior to preoperative PG in bariatric patients. In patients with moderate or severe  
37  
38 338 OSA, CPAP treatment is part of standard care. The primary outcome is QALY difference  
39  
40 339 compared to costs, where QALYs are measured by the EQ-5D. Therefore, the sample size  
41  
42 340 calculation is based on a predefined non-inferiority margin of 0.03 on the EQ-5D score.  
43  
44 341 Based on an EQ-5D score of 0.68 in the usual care group, QALYs of OSA patients before and  
45  
46 342 after one year of CPAP treatment, and calculating with 80% power to detect the predefined  
47  
48 343 non-inferiority margin at a one-sided a level of 0.05, there are 621 patients needed in each  
49  
50 344 study group(44). Assuming a loss to follow up of 10%, the total study population will be set  
51  
52 345 at 1380 patients, resulting in 690 patients per arm.  
53  
54  
55  
56  
57  
58  
59

60 346

### 347 **Analysis of primary outcome measures**

348 An extensive cost-effectiveness analysis (CEA) and budget impact analysis (BIA) will be  
349 performed. The cost-effectiveness analysis adheres to the Dutch guideline (45) and reporting  
350 will adhere to the CHEERS checklist(46). The BIA will adhere to current Dutch guidelines and  
351 also guidelines as published by Sullivan et al. (47). We aim to perform a trial based economic  
352 evaluation in which we do not extrapolate costs and effect outside the study period. The  
353 effect of the CEA will be expressed in change of QALYs during the study period, and this  
354 outcome will be compared to the total costs of each individual patient. Outcomes will be  
355 average cost per patient, differences between groups and incremental costs per QALY. An  
356 incremental cost-effectiveness ratio analysis will be performed to compare the outcomes (in  
357 QALY) rendered by the CPOX and the PPG strategy to the costs related to each perioperative  
358 strategy.

359 Sensitivity analysis will be carried out to correct all potential confounders, such as gender,  
360 age, preoperative BMI, comorbidities, choice of bariatric centre, intraoperative and  
361 postoperative administered opioids, smoking status, previous ENT surgery. One-way  
362 sensitivity analyses will be illustrated graphically using tornado diagrams; probabilistic  
363 sensitivity analyses (PSA) will be illustrated in cost-effectiveness planes and so called cost-  
364 effectiveness acceptability curves. Bootstrapping will be used if deemed necessary.

365

#### 366 Cost assessment

367 This analysis will be performed using a societal perspective.

368

- 369 • Identification: we aim to identify all health care utilization for every included patient  
370 within the study period. All consumption potentially related to obesity, bariatric

1  
2  
3 371 surgery, and obstructive sleep apnea will be identified in this total set of health care  
4  
5 372 consumption. The latter comprised a vast amount of health care resources that are  
6  
7  
8 373 potentially related to OSA: costs resources related to sleep medicine, cardiovascular  
9  
10 374 disease, pulmonary disease, ear-, nose and throat disease, and work- or traffic  
11  
12  
13 375 related accidents.

14  
15 376 • Measurement: utilization of health care resources within the hospital were gathered  
16  
17 377 by using each hospital billing system (detailed health care consumption data send to  
18  
19 378 insurance companies). Additional medical costs that were made in a different  
20  
21 379 hospital or outside of hospitals (i.e. visits to the general practitioner, dietician,  
22  
23 380 physical therapist) were scored based on patients' answers in the Medical Cost  
24  
25 381 Questionnaire. The outcomes were scored in a numerical manner, for example 0, 1, 2  
26  
27 382 visits to the GP, etc. These results were analysed and valued based on a fixed  
28  
29 383 national cost as documented in the Dutch Health Care Institute guideline.  
30  
31 384 • Evaluation of costs: Unit costs used are derived from the guidelines commissioned by  
32  
33 385 the Dutch Health Care Institute (Zorginstituut Nederland). Moreover, additional unit  
34  
35 386 costs are gathered from the Dutch Health Care Authority (Nederlandse Zorg  
36  
37 387 Autoriteit; <https://www.nza.nl/>)  
38  
39  
40  
41  
42  
43  
44  
45  
46

#### 389 **Analysis of secondary outcome measures**

47  
48  
49 390 Baseline characteristics of patients will be documented with mean/standard deviation or  
50  
51 391 median/range, depending on normality. The number of desaturations, both  
52  
53 392 cardiopulmonary and general complications, interventions, total hospital stay and total costs  
54  
55 393 between both groups will be analysed with the independent t-test/Mann-Whitney U test.  
56  
57 394 Compliance of CPAP and opioids use will be evaluated with chi-square testing. Mixed model  
58  
59  
60



1  
2  
3 395 analysis will be performed to evaluate the weight loss, severity of OSA symptoms and CPAP  
4  
5 396 adherence at different time points. Predictive values for cardiopulmonary complications will  
6  
7  
8 397 be evaluated with logistic regression analysis, starting with a univariate analysis. All variables  
9  
10 398 with a significance level  $p < 0.2$  will be included in a multivariate analysis. Within this  
11  
12  
13 399 analysis, only seven independent variables may be included as ten event cases are allowed  
14  
15 400 per dependent predictor. Statistical significance is defined as  $p < 0.05$ .

16  
17  
18 401 To correct for potential confounder between these (non-randomized) cohorts, all outcomes  
19  
20 402 will be analysed by propensity score matching or multivariate analysis, depending on the  
21  
22  
23 403 secondary outcome of interest (48).

24  
25 404

#### 26 27 405 **Loss to follow-up or replacement of participants**

28  
29  
30 406 Study participants will be replaced with new participants in case of A) cancellation of the  
31  
32 407 surgery, B) uncompleted preoperative questionnaire, or C) when positive airway pressure  
33  
34 408 treatment is switched to a different modality such as a mandibular advancement device.

35  
36  
37 409 Patients who do not complete the postoperative questionnaire at 12 months after surgery  
38  
39 410 due to other reasons, will be considered lost-to-follow-up.

40  
41  
42 411

#### 43 44 412 **Patient and public involvement**

45  
46  
47 413 Patients and the public were not involved in the design, or conduct, of our research.

48  
49 414 However, a non-profit organization for OSA patients was consulted in the final phase of  
50  
51  
52 415 designing this study. The organization underlined the need for this research and requested  
53  
54 416 no significant changes to the protocol. In addition, OSA patients who previously underwent  
55  
56 417 bariatric surgery in the hospital that initiated this study were invited to share their opinion  
57  
58  
59 418 on the questionnaires and OSA outcomes.  
60

1  
2  
3 419  
4  
56 420 **Ethics and dissemination**

7  
8 421 The Medical Ethics Committee United (MEC-U) approved this study, in accordance with the  
9  
10 422 Dutch law Medical Research Involving Human Subjects Act (WMO), Medical Research in  
11  
12 423 Humans (MEC-U, W17.050). In addition, local Medical Ethics Committees of each  
13  
14  
15 424 participating hospital also reviewed and approved the study protocol.  
16  
17

18 425

19  
20 426 Findings of the POPCORN study will be disseminated to all disciplines that are involved in  
21  
22 427 care for bariatric surgery, through articles in peer-reviewed journals, national and  
23  
24 428 international congresses, and revising the national guidelines of the Netherlands.  
25  
26

27 429

30 430 **DISCUSSION**

31  
32 431 The POPCORN study is a prospective observational cohort study that evaluates the cost-  
33  
34 432 effectiveness of two strategies of perioperative care in bariatric patients without a pre-  
35  
36 433 existent OSA diagnosis: CPOX without extensive preoperative OSA screening vs. mandatory  
37  
38 434 PG, potentially followed by CPAP treatment. The outcomes will enable the development of  
39  
40 435 new, evidence-based guidelines on perioperative care for bariatric patients with no known  
41  
42 436 OSA. The secondary outcomes, such as (cardiopulmonary) complications, OSA-related  
43  
44 437 symptoms and quality of life, will provide an overview of the correlation between cost-  
45  
46 438 effectiveness and clinical outcomes that are highly relevant in the decision making for  
47  
48 439 perioperative care in bariatric patients.  
49  
50  
51

52  
53 440 Best practice regarding perioperative care in bariatric patient has been an ongoing  
54  
55 441 debate for many years, with high prevalence and potential detrimental effects of undetected  
56  
57 442 OSA on one side and substantial costs of related perioperative care and CPAP treatment on  
58  
59  
60

1  
2  
3 443 the other(27, 49, 50). No comparative studies between different perioperative strategies  
4  
5  
6 444 have been conducted to evaluate outcomes of postoperative complications or cost-  
7  
8 445 effectiveness. In a recent review, conducted by the US preventative task force, no  
9  
10 446 effectiveness of OSA screening in patients who are asymptomatic or who experience  
11  
12  
13 447 unrecognized symptoms was found(27). Despite improvements in intermediate outcomes  
14  
15 448 such as AHI or sleepiness symptoms, no improvement in final health outcomes have been  
16  
17 449 demonstrated, such as mortality or serious adverse events. The paucity in evidence  
18  
19  
20 450 regarding beneficial outcomes is especially relevant when cost-effectiveness is regarded. The  
21  
22  
23 451 obesity epidemic and its related costs are continuously expanding, and this underlines the  
24  
25 452 need for optimal use of available health care resources. With no confirmative data on  
26  
27 453 positive influence of OSA screening in bariatric patients with no known OSA, and  
28  
29  
30 454 approximately 700.000 bariatric procedures annually worldwide, clarification on this topic is  
31  
32 455 needed.

33  
34  
35 456 The perioperative strategies evaluated in the POPCORN study are both widely used in  
36  
37 457 general practice and it is expected that results of this study will lead to evidence-based  
38  
39  
40 458 recommendations and guidelines.

41  
42 459 The strength of this study is that a general, bariatric population is evaluated. In both  
43  
44 460 cohorts, large groups of bariatric patients are prospectively observed, while little exclusion  
45  
46  
47 461 criteria are applied. In addition, the follow-up period in this study that investigates a  
48  
49  
50 462 perioperative intervention is relatively long. Previous studies that describe preoperative  
51  
52 463 assessment and treatment of OSA mainly reported prevalence of newly detected OSA and  
53  
54 464 related adverse outcomes restricted to the direct perioperative period (51). The follow-up  
55  
56  
57 465 duration of one year after surgery enables us to investigate long-term clinical outcomes of a  
58  
59 466 perioperative regime. Interesting comparisons are to be made between the preoperatively  
60

1  
2  
3 467 diagnosed OSA patients and the unscreened bariatric patients in terms of sleepiness  
4  
5 468 symptoms, daytime productivity, general quality of life and health care resource utilization.  
6  
7

8 469 Ideally, a randomized controlled trial would have been conducted, in which all  
9  
10 470 patients would undergo a preoperative PG. Consecutive randomization would have  
11  
12 471 determined the type of perioperative care: CPOX monitoring or treatment based on the PG  
13  
14 472 outcome. However, this was considered unethical, as randomization into the CPOX cohort  
15  
16 473 would result in withholding appropriate treatment from patients with confirmed OSA  
17  
18 474 diagnosis, which is associated with many health care hazards (30, 31, 52). Despite the non-  
19  
20 475 randomized design of the POPCORN trial, the large sample size will provide sufficient data to  
21  
22 476 render a balanced statement that will be representable for the general bariatric population  
23  
24 477 in the Netherlands. Furthermore, it is expected that implementation of these perioperative  
25  
26 478 strategies is also feasible in countries other than the Netherlands.  
27  
28  
29  
30  
31

32 479 In addition to the non-randomized design of the POPCORN study, another limitation  
33  
34 480 is that preoperative weight loss programs can result in changes in comorbidities. This can be  
35  
36 481 particularly true for OSA, a comorbidity that is greatly influenced by weight loss. Each  
37  
38 482 participating hospital applied local protocols which advocates weight loss before surgery,  
39  
40 483 but in absence of a strict program we do not expect major changes in weight between  
41  
42 484 preoperative (OSA) assessment and the surgical procedure. In conclusion, the POPCORN  
43  
44 485 study will conclude which perioperative strategy is most cost-effective for obese patients  
45  
46 486 scheduled for bariatric surgery and who have an unknown OSA status. These data will  
47  
48 487 contribute to evidence-based guidelines which are urgently needed in this particular field of  
49  
50 488 bariatric care.  
51  
52  
53  
54  
55  
56

57 489

58  
59 490 **Contributors**  
60

1  
2  
3 491 EJH conceived and designed the study, with support of RJW, SMMDC, RNVV, DJS, AD, EGB,  
4  
5  
6 492 JWMG and FMHVD, who all contributed significantly to the study design. CALDR, KK and  
7  
8 493 GWJF reviewed and refined the research questions and search strategy. SVV wrote the first  
9  
10 494 draft of this manuscript. EJH is the principal investigator and SVV is the main investigator. All  
11  
12  
13 495 authors critically reviewed the content and approved the final manuscript.  
14

15 496

### 17 497 **Funding**

19  
20 498 This work was supported by ZonMw, grant number '843004110'.  
21  
22

23 499

### 25 500 **Competing interests**

27 501 Not applicable for any of the authors  
28  
29

30 502

### 32 503 **Data sharing statement**

34 504 After completion of the project, the research data will be stored and shared via EASY, a  
35  
36 505 certified sustainable data archive of Data Archiving and Networked Services (DANS). In EASY  
37  
38 506 each dataset will receive a Digital Object Identifier (DOI). The preferred formats of DANS  
39  
40 507 (e.g. PDF/A, Unicode text, DB tables, SPSS Portable) and the Dublin Core Metadata standard  
41  
42 508 will be used.  
43  
44  
45  
46  
47  
48  
49  
50  
51  
52  
53  
54  
55  
56  
57  
58  
59  
60

509 **References**

- 510
- 511 1. WHO. Obesity and overweight; Fact sheet. . 2018.
- 512 2. Buchwald H, Avidor Y, Braunwald E, Jensen MD, Pories W, Fahrbach K, et al. Bariatric surgery: a systematic review and meta-analysis. *Jama*. 2004;292(14):1724-37.
- 513 3. Maciejewski ML, Arterburn DE, Van Scoyoc L, Smith VA, Yancy WS, Jr., Weidenbacher HJ, et al. Bariatric Surgery and Long-term Durability of Weight Loss. *JAMA surgery*. 2016;151(11):1046-55.
- 514 4. Young T, Skatrud J, Peppard PE. Risk factors for obstructive sleep apnea in adults. *Jama*. 2004;291(16):2013-6.
- 515 5. Peppard PE, Young T, Palta M, Dempsey J, Skatrud J. Longitudinal study of moderate weight change and sleep-disordered breathing. *Jama*. 2000;284(23):3015-21.
- 516 6. Sateia MJ. International classification of sleep disorders-third edition: highlights and modifications. *Chest*. 2014;146(5):1387-94.
- 517 7. Giles TL, Lasserson TJ, Smith BJ, White J, Wright J, Cates CJ. Continuous positive airways pressure for obstructive sleep apnoea in adults. *The Cochrane database of systematic reviews*. 2006(1):CD001106.
- 518 8. de Raaff CA, Pierik AS, Coblijn UK, de Vries N, Bonjer HJ, van Wagenveld BA. Value of routine polysomnography in bariatric surgery. *Surgical endoscopy*. 2017;31(1):245-8.
- 519 9. Peromaa-Haavisto P, Tuomilehto H, Kossi J, Virtanen J, Luostarinen M, Pihlajamaki J, et al. Prevalence of Obstructive Sleep Apnoea Among Patients Admitted for Bariatric Surgery. A Prospective Multicentre Trial. *Obesity surgery*. 2016;26(7):1384-90.
- 520 10. Peppard PE, Young T, Barnet JH, Palta M, Hagen EW, Hla KM. Increased prevalence of sleep-disordered breathing in adults. *American journal of epidemiology*. 2013;177(9):1006-14.
- 521 11. Hudgel DW, Patel SR, Ahasic AM, Bartlett SJ, Bessesen DH, Coaker MA, et al. The Role of Weight Management in the Treatment of Adult Obstructive Sleep Apnea. An Official American Thoracic Society Clinical Practice Guideline. *American journal of respiratory and critical care medicine*. 2018;198(6):e70-e87.
- 522 12. Young T, Peppard PE, Gottlieb DJ. Epidemiology of obstructive sleep apnea: a population health perspective. *American journal of respiratory and critical care medicine*. 2002;165(9):1217-39.
- 523 13. Sarkhosh K, Switzer NJ, El-Hadi M, Birch DW, Shi X, Karmali S. The impact of bariatric surgery on obstructive sleep apnea: a systematic review. *Obesity surgery*. 2013;23(3):414-23.
- 524 14. Ravesloot MJ, Hilgevoord AA, van Wagenveld BA, de Vries N. Assessment of the effect of bariatric surgery on obstructive sleep apnea at two postoperative intervals. *Obesity surgery*. 2014;24(1):22-31.
- 525 15. de Raaff CA, Coblijn UK, Ravesloot MJ, de Vries N, de Lange-de Klerk ES, van Wagenveld BA. Persistent moderate or severe obstructive sleep apnea after laparoscopic Roux-en-Y gastric bypass: which patients? *Surgery for obesity and related diseases : official journal of the American Society for Bariatric Surgery*. 2016;12(10):1866-72.
- 526 16. van Veldhuisen SL, Hazebroek EJ. Obstructive Sleep Apnea in Adults. *The New England journal of medicine*. 2019;381(3):e7.
- 527 17. Singh M, Liao P, Kobah S, Wijeysondera DN, Shapiro C, Chung F. Proportion of surgical patients with undiagnosed obstructive sleep apnoea. *British journal of anaesthesia*. 2013;110(4):629-36.

- 1  
2  
3 556 18. Kaw R, Michota F, Jaffer A, Ghamande S, Auckley D, Golish J. Unrecognized sleep  
4 557 apnea in the surgical patient: implications for the perioperative setting. *Chest*.  
5 558 2006;129(1):198-205.  
6  
7 559 19. Kaw R, Chung F, Pasupuleti V, Mehta J, Gay PC, Hernandez AV. Meta-analysis of the  
8 560 association between obstructive sleep apnoea and postoperative outcome. *British journal of*  
9 561 *anaesthesia*. 2012;109(6):897-906.  
10  
11 562 20. Flancbaum L, Belsley S. Factors affecting morbidity and mortality of Roux-en-Y gastric  
12 563 bypass for clinically severe obesity: an analysis of 1,000 consecutive open cases by a single  
13 564 surgeon. *Journal of gastrointestinal surgery : official journal of the Society for Surgery of the*  
14 565 *Alimentary Tract*. 2007;11(4):500-7.  
15  
16 566 21. van Veldhuisen SL, Arslan I, Deden LN, Aarts EO, Hazebroek EJ. Safety of Continuous  
17 567 Postoperative Pulse Oximetry Monitoring Without Obstructive Sleep Apnea Screening in >  
18 568 5000 Patients Undergoing Bariatric Surgery. *Obesity surgery*. 2019.  
19 569 22. O'Reilly E, Doherty L, O'Boyle C. How Relevant Is Pre-operative Obstructive Sleep  
20 570 Apnoea in the Asymptomatic Bariatric Surgery Patient? *Obesity surgery*. 2019.  
21  
22 571 23. Meurgey JH, Brown R, Woroszył-Chrusciel A, Steier J. Peri-operative treatment of  
23 572 sleep-disordered breathing and outcomes in bariatric patients. *Journal of thoracic disease*.  
24 573 2018;10(Suppl 1):S144-S52.  
25  
26 574 24. de Raaff CAL, Gorter-Stam MAW, de Vries N, Sinha AC, Jaap Bonjer H, Chung F, et al.  
27 575 Perioperative management of obstructive sleep apnea in bariatric surgery: a consensus  
28 576 guideline. *Surgery for obesity and related diseases : official journal of the American Society*  
29 577 *for Bariatric Surgery*. 2017;13(7):1095-109.  
30  
31 578 25. Chiu HY, Chen PY, Chuang LP, Chen NH, Tu YK, Hsieh YJ, et al. Diagnostic accuracy of  
32 579 the Berlin questionnaire, STOP-BANG, STOP, and Epworth sleepiness scale in detecting  
33 580 obstructive sleep apnea: A bivariate meta-analysis. *Sleep medicine reviews*. 2017;36:57-70.  
34  
35 581 26. Turnbull CD, Stradling JR. To screen or not to screen for obstructive sleep apnea, that  
36 582 is the question. *Sleep medicine reviews*. 2017;36:125-7.  
37  
38 583 27. Force USPST, Bibbins-Domingo K, Grossman DC, Curry SJ, Davidson KW, Epling JW, Jr.,  
39 584 et al. Screening for Obstructive Sleep Apnea in Adults: US Preventive Services Task Force  
40 585 Recommendation Statement. *Jama*. 2017;317(4):407-14.  
41  
42 586 28. Weaver TE, Grunstein RR. Adherence to continuous positive airway pressure therapy:  
43 587 the challenge to effective treatment. *Proceedings of the American Thoracic Society*.  
44 588 2008;5(2):173-8.  
45  
46 589 29. Tregear S, Reston J, Schoelles K, Phillips B. Continuous positive airway pressure  
47 590 reduces risk of motor vehicle crash among drivers with obstructive sleep apnea: systematic  
48 591 review and meta-analysis. *Sleep*. 2010;33(10):1373-80.  
49  
50 592 30. Somers VK, White DP, Amin R, Abraham WT, Costa F, Culebras A, et al. Sleep apnea  
51 593 and cardiovascular disease: an American Heart Association/American College of Cardiology  
52 594 Foundation Scientific Statement from the American Heart Association Council for High Blood  
53 595 Pressure Research Professional Education Committee, Council on Clinical Cardiology, Stroke  
54 596 Council, and Council on Cardiovascular Nursing. *Journal of the American College of*  
55 597 *Cardiology*. 2008;52(8):686-717.  
56  
57 598 31. Siccoli MM, Pepperell JC, Kohler M, Craig SE, Davies RJ, Stradling JR. Effects of  
58 599 continuous positive airway pressure on quality of life in patients with moderate to severe  
59 600 obstructive sleep apnea: data from a randomized controlled trial. *Sleep*. 2008;31(11):1551-8.



- 1  
2  
3 601 32. Jonas DE, Amick HR, Feltner C, Weber RP, Arvanitis M, Stine A, et al. Screening for  
4 602 Obstructive Sleep Apnea in Adults: Evidence Report and Systematic Review for the US  
5 603 Preventive Services Task Force. *Jama*. 2017;317(4):415-33.
- 6 604 33. Fried M, Hainer V, Basdevant A, Buchwald H, Deitel M, Finer N, et al. Interdisciplinary  
7 605 European guidelines on surgery of severe obesity. *Obesity facts*. 2008;1(1):52-9.
- 8 606 34. Epstein LJ, Kristo D, Strollo PJ, Jr., Friedman N, Malhotra A, Patil SP, et al. Clinical  
9 607 guideline for the evaluation, management and long-term care of obstructive sleep apnea in  
10 608 adults. *Journal of clinical sleep medicine : JCSM : official publication of the American*  
11 609 *Academy of Sleep Medicine*. 2009;5(3):263-76.
- 12 610 35. Thorell A, MacCormick AD, Awad S, Reynolds N, Roulin D, Demartines N, et al.  
13 611 Guidelines for Perioperative Care in Bariatric Surgery: Enhanced Recovery After Surgery  
14 612 (ERAS) Society Recommendations. *World journal of surgery*. 2016;40(9):2065-83.
- 15 613 36. Brooks R. EuroQol: the current state of play. *Health policy*. 1996;37(1):53-72.
- 16 614 37. Lamers LM, McDonnell J, Stalmeier PF, Krabbe PF, Busschbach JJ. The Dutch tariff:  
17 615 results and arguments for an effective design for national EQ-5D valuation studies. *Health*  
18 616 *economics*. 2006;15(10):1121-32.
- 19 617 38. Bouwmans C, Krol M, Severens H, Koopmanschap M, Brouwer W, Hakkaart-van  
20 618 Roijen L. The iMTA Productivity Cost Questionnaire: A Standardized Instrument for  
21 619 Measuring and Valuing Health-Related Productivity Losses. *Value in health : the journal of*  
22 620 *the International Society for Pharmacoeconomics and Outcomes Research*. 2015;18(6):753-  
23 621 8.
- 24 622 39. Dindo D, Demartines N, Clavien PA. Classification of surgical complications: a new  
25 623 proposal with evaluation in a cohort of 6336 patients and results of a survey. *Annals of*  
26 624 *surgery*. 2004;240(2):205-13.
- 27 625 40. Brazier J, Roberts J, Deverill M. The estimation of a preference-based measure of  
28 626 health from the SF-36. *Journal of health economics*. 2002;21(2):271-92.
- 29 627 41. Chasens ER, Ratcliffe SJ, Weaver TE. Development of the FOSQ-10: a short version of  
30 628 the Functional Outcomes of Sleep Questionnaire. *Sleep*. 2009;32(7):915-9.
- 31 629 42. Weaver TE, Laizner AM, Evans LK, Maislin G, Chugh DK, Lyon K, et al. An instrument  
32 630 to measure functional status outcomes for disorders of excessive sleepiness. *Sleep*.  
33 631 1997;20(10):835-43.
- 34 632 43. Johns MW. A new method for measuring daytime sleepiness: the Epworth sleepiness  
35 633 scale. *Sleep*. 1991;14(6):540-5.
- 36 634 44. McMillan A, Bratton DJ, Faria R, Laskawiec-Szkonter M, Griffin S, Davies RJ, et al.  
37 635 Continuous positive airway pressure in older people with obstructive sleep apnoea  
38 636 syndrome (PREDICT): a 12-month, multicentre, randomised trial. *The Lancet Respiratory*  
39 637 *medicine*. 2014;2(10):804-12.
- 40 638 45. Versteegh M, Knies S, Brouwer W. From Good to Better: New Dutch Guidelines for  
41 639 Economic Evaluations in Healthcare. *Pharmacoeconomics*. 2016;34(11):1071-4.
- 42 640 46. Husereau D, Drummond M, Petrou S, Carswell C, Moher D, Greenberg D, et al.  
43 641 Consolidated Health Economic Evaluation Reporting Standards (CHEERS) statement. *Bmj*.  
44 642 2013;346:f1049.
- 45 643 47. Sullivan SD, Mauskopf JA, Augustovski F, Jaime Caro J, Lee KM, Minchin M, et al.  
46 644 Budget impact analysis-principles of good practice: report of the ISPOR 2012 Budget Impact  
47 645 Analysis Good Practice II Task Force. *Value in health : the journal of the International Society*  
48 646 *for Pharmacoeconomics and Outcomes Research*. 2014;17(1):5-14.
- 49  
50  
51  
52  
53  
54  
55  
56  
57  
58  
59  
60



- 1  
2  
3 647 48. Elze MC, Gregson J, Baber U, Williamson E, Sartori S, Mehran R, et al. Comparison of  
4 648 Propensity Score Methods and Covariate Adjustment: Evaluation in 4 Cardiovascular Studies.  
5 649 Journal of the American College of Cardiology. 2017;69(3):345-57.  
6  
7 650 49. Zaremba S, Mojica JE, Eikermann M. Perioperative sleep apnea: a real problem or did  
8 651 we invent a new disease? F1000Research. 2016;5.  
9 652 50. Nepomnayshy D, Hesham W, Erickson B, MacDonald J, Iorio R, Brams D. Sleep apnea:  
10 653 is routine preoperative screening necessary? Obesity surgery. 2013;23(3):287-91.  
11 654 51. de Raaff CA, Coblijn UK, de Vries N, van Wagensveld BA. Is fear for postoperative  
12 655 cardiopulmonary complications after bariatric surgery in patients with obstructive sleep  
13 656 apnea justified? A systematic review. American journal of surgery. 2016;211(4):793-801.  
14 657 52. George CF. Reduction in motor vehicle collisions following treatment of sleep apnoea  
15 658 with nasal CPAP. Thorax. 2001;56(7):508-12.  
16  
17  
18  
19  
20  
21  
22  
23  
24  
25  
26  
27  
28  
29  
30  
31  
32  
33  
34  
35  
36  
37  
38  
39  
40  
41  
42  
43  
44  
45  
46  
47  
48  
49  
50  
51  
52  
53  
54  
55  
56  
57  
58  
59  
60

For peer review only

1  
2  
3 663 **Legends**

4  
5 664

6  
7  
8 665 **Figure 1 – Flowchart of the POPCORN study**

9  
10 666 *PG* Polygraphy, *OSA* obstructive sleep apnea, *CPAP* continuous positive airway pressure  
11  
12  
13  
14  
15  
16  
17  
18  
19  
20  
21  
22  
23  
24  
25  
26  
27  
28  
29  
30  
31  
32  
33  
34  
35  
36  
37  
38  
39  
40  
41  
42  
43  
44  
45  
46  
47  
48  
49  
50  
51  
52  
53  
54  
55  
56  
57  
58  
59  
60

For peer review only

1  
2  
3  
4  
5  
6  
7  
8  
9  
10  
11  
12  
13  
14  
15  
16  
17  
18  
19  
20  
21  
22  
23  
24  
25  
26  
27  
28  
29  
30  
31  
32  
33  
34  
35  
36  
37  
38  
39  
40  
41



Figure 1. Flowchart of POPCORN study

PG polygraphy, OSA obstructive sleep apnea, CPAP continuous positive airway pressure
